1 **Shifting microbial communities sustain multi-year iron reduction and methanogenesis in**  
2 **ferruginous sediment incubations**

3 Marcus S. Bray<sup>1</sup>, Jieying Wu<sup>1</sup>, Benjamin C. Reed<sup>1</sup>, Cecilia B. Kretz<sup>2</sup>, Rachel L. Simister<sup>3</sup>,  
4 Cynthia Henny<sup>4</sup>, Frank J. Stewart<sup>1,2</sup>, Thomas J. DiChristina<sup>1,2</sup>, Jay A. Brandes<sup>5</sup>, David A.  
5 Fowle<sup>6</sup>, Sean A. Crowe<sup>3</sup>, Jennifer B. Glass<sup>1,2#</sup>

6 <sup>1</sup>School of Biology, Georgia Institute of Technology, Atlanta, GA, 30332, USA

7 <sup>2</sup>School of Earth and Atmospheric Sciences, Georgia Institute of Technology, Atlanta, GA,  
8 30332, USA

9 <sup>3</sup>Departments of Microbiology & Immunology and Earth, Ocean, & Atmospheric Sciences,  
10 University of British Columbia, Vancouver, BC, Canada

11 <sup>4</sup>Research Center for Limnology, Indonesian Institute of Sciences, Cibinong, Indonesia

12 <sup>5</sup>Skidaway Institute of Oceanography, Savannah, GA, 31411, USA

13 <sup>6</sup>Department of Geology, University of Kansas, Lawrence, KS, 66045, USA

14 #Correspondence: 311 Ferst Drive Atlanta, GA; Telephone: 404-894-3942; Fax: 404-894-5638;

15 Email: [Jennifer.Glass@eas.gatech.edu](mailto:Jennifer.Glass@eas.gatech.edu)

16

17 Type: Research Article

18

19 **Abstract**

20 Reactive Fe<sup>3+</sup> minerals can influence methane (CH<sub>4</sub>) emissions by inhibiting microbial  
21 methanogenesis or by stimulating anaerobic CH<sub>4</sub> oxidation. The balance between Fe<sup>3+</sup> reduction,  
22 methanogenesis, and methane oxidation in the ferruginous Archean oceans would have  
23 controlled CH<sub>4</sub> fluxes to the atmosphere, thereby regulating the capacity for CH<sub>4</sub> to warm the  
24 early Earth under the Faint Young Sun. We studied CH<sub>4</sub> and Fe cycling in anoxic incubations of  
25 ferruginous sediment from the Archean ocean analogue Lake Matano, Indonesia over three  
26 successive transfers (500 days total). Iron reduction, methanogenesis, methane oxidation, and  
27 microbial taxonomy were monitored in treatments amended with 10 mM ferrihydrite or goethite.  
28 After three dilutions, Fe<sup>3+</sup> reduction persisted only in bottles with ferrihydrite. Enhanced CH<sub>4</sub>  
29 production was observed in the presence of goethite. Methane oxidation was observed throughout  
30 incubations, although stoichiometry suggested that Fe<sup>3+</sup> was not the sole electron acceptor. 16S  
31 rRNA profiles continuously changed over the course of enrichment, with ultimate dominance of  
32 unclassified members of the order Desulfuromonadales in all treatments and Rhodocyclaceae in  
33 treatments amended with CH<sub>4</sub>. Microbial diversity decreased markedly over the course of  
34 incubation, with subtle differences being observed between ferrihydrite and goethite. These  
35 results suggest that Fe<sup>3+</sup>-oxide mineralogy and availability of electron donors could have led to  
36 spatial separation of Fe<sup>3+</sup>-reducing and methanogenic microbial communities in ancient  
37 ferruginous marine sediments, potentially explaining the persistence of CH<sub>4</sub> as a greenhouse gas  
38 throughout the Archean.

39

40

41 **INTRODUCTION**

42 Anoxic and ferruginous conditions were common in Archean oceans (Poulton & Canfield, 2011).  
43 In Archean seawater, Fe would have undergone extensive redox cycling via microbial  
44 photoferrotrophy or abiotic photo-oxidation of dissolved  $\text{Fe}^{2+}$  to  $\text{Fe}^{3+}$  followed by microbial  
45 respiration of  $\text{Fe}^{3+}$  to  $\text{Fe}^{2+}$  (Kappler et al., 2005 ; Crowe et al., 2008a ; Konhauser et al., 2005).  
46 Indeed,  $\text{Fe}^{3+}$  reduction evolved early in Earth's history (Craddock & Dauphas, 2011 ; Johnson et  
47 al., 2008) and may have contributed extensively to organic matter oxidation in the Archean  
48 (Vargas et al., 1998).

49 Elevated atmospheric methane ( $\text{CH}_4$ ; 100-1000 ppmv in the Archean vs. ~2 ppmv in the  
50 modern atmosphere) could have played a role in the Archean greenhouse effect that sustained  
51 temperatures warm enough for liquid water under considerably lower solar radiation (Pavlov et  
52 al., 2000 ; Haqq-Misra et al., 2008 ; Kasting, 2005). The source of Archean  $\text{CH}_4$  was likely  
53 hydrogenotrophic methanogenesis ( $\text{CO}_2 + 4 \text{H}_2 \rightarrow \text{CH}_4 + 2\text{H}_2\text{O}$ ; (Ueno et al., 2006 ; Battistuzzi  
54 et al., 2004). However, this form of methanogenesis typically yields minimal free energy and is  
55 outcompeted by metal-reducing organisms with a higher affinity for  $\text{H}_2$  than methanogens in the  
56 presence of poorly crystalline  $\text{Fe}^{3+}$  (e.g. ferrihydrite; Lovley & Phillips, 1987 ; Lovley &  
57 Goodwin, 1988 ; Zhou et al., 2014). Ferrihydrite reduction can also outcompete acetoclastic  
58 methanogenesis ( $\text{CH}_3\text{COO}^- + \text{H}^+ \rightarrow \text{CH}_4 + \text{CO}_2$ ) due to the higher affinity for acetate ( $\text{CH}_3\text{COO}^-$   
59 ) by  $\text{Fe}^{3+}$ -reducing bacteria compared to methanogens (Lovley & Phillips, 1986), although  
60 acetoclastic methanogenesis likely evolved late in Earth's history (Fournier & Gogarten, 2008).  
61 Ferruginous oceans would have further suppressed  $\text{CH}_4$  emissions if  $\text{Fe}^{3+}$  played a role in  
62 supplying electron acceptors for  $\text{CH}_4$  oxidation, either as the direct oxidant, or indirectly through  
63 the regeneration of sulfate through oxidation of reduced sulfur compounds (Sivan et al., 2014).

64 Methane oxidation coupled directly to  $\text{Fe}^{3+}$  reduction is thermodynamically favorable  
65 according to the free energy yield with ferrihydrite ( $\text{CH}_4 + 8 \text{Fe}(\text{OH})_3 + 15\text{H}^+ \rightarrow \text{HCO}_3^- + 8\text{Fe}^{2+}$   
66  $+ 21\text{H}_2\text{O}$ ;  $\Delta G_r^0 = -571 \text{ kJ mol}^{-1} \text{ CH}_4$ ) and goethite ( $\text{CH}_4 + 8 \text{FeOOH} + 15\text{H}^+ \rightarrow \text{HCO}_3^- + 8\text{Fe}^{2+} +$   
67  $13\text{H}_2\text{O}$ ;  $\Delta G_r^0 = -355 \text{ kJ mol}^{-1} \text{ CH}_4$ ) as terminal electron acceptors. We would expect to observe a  
68 stoichiometric ratio of 1  $\text{CH}_4$  oxidized per 8  $\text{Fe}^{3+}$  reduced and, based on energetic yields, the  
69 preferential use of ferrihydrite over goethite as the electron acceptor in this putative metabolism.  
70 In addition, accumulating geochemical evidence for microbial  $\text{CH}_4$  oxidation coupled to, or  
71 stimulated by,  $\text{Fe}^{3+}$  reduction is widespread across modern anoxic ecosystems and anaerobic  
72 digester communities (Sivan et al., 2011 ; Segarra et al., 2013 ; Beal et al., 2009 ; Amos et al.,  
73 2012 ; Riedinger et al., 2014 ; Noroi et al., 2013 ; Crowe et al., 2011 ; Sturm et al., 2015 ;  
74 Egger et al., 2015 ; Zehnder & Brock, 1980 ; Sivan et al., 2014 ; Fu et al., 2016 ; Rooze et al.,  
75 2016). However, robust and direct evidence for this putative metabolism in the form of stable  
76 enrichment cultures or microbial isolates remains elusive.

77 Despite the possible importance of coupled Fe and  $\text{CH}_4$  cycling in the Archean Eon,  
78 long-term studies of  $\text{Fe}^{3+}$  reduction under low organic carbon and high  $\text{CH}_4$  conditions remain  
79 sparse. Lake Matano, Indonesia is one of the only modern analogues for the ferruginous Archean  
80 oceans (Crowe et al., 2008a). Despite the presence of  $\text{Fe}^{3+}$  oxides that might be expected to  
81 suppress methanogenesis,  $\text{CH}_4$  accumulates to 1.4 mM in anoxic deep waters (Crowe et al.,  
82 2008a ; Crowe et al., 2011 ; Crowe et al., 2008b ; Crowe et al., 2007). Methanotrophy is a key  
83 carbon fixation process in Lake Matano's oxic-anoxic transition zone, and the dearth of other  
84 oxidants (<100 nM nitrate and sulfate) suggests that  $\text{Fe}^{3+}$  might be the primary electron acceptor  
85 in methanotrophy (Sturm et al., 2015 ; Crowe et al., 2011). In this study, we examined the  
86 influence of  $\text{CH}_4$  and  $\text{Fe}^{3+}$  mineral speciation on  $\text{CH}_4$  and Fe biogeochemistry together with

87 microbial community composition over three successive dilutions (500 total days of incubation)  
88 of anoxic Lake Matano sediments.

89

## 90 **MATERIALS AND METHODS**

91

### 92 **Sample collection and storage**

93 A 15-cm sediment core from 200 m water depth in Lake Matano, Sulawesi Island, Indonesia  
94 (2°26'S, 121°15'E; *in situ* sediment temperature ~27°C) was sampled in November 2010 and  
95 sub-sampled at 5 cm increments. Sediments from 0-5 and 5-10 cm depth were fluffy and black,  
96 and 10-15 cm was dark gray. Sediments were sealed in gas-tight bags with no headspace  
97 (Hansen et al., 2000) and stored at 4°C until incubations began in March 2015.

98

### 99 **Enrichment medium and substrate synthesis**

100 A modified artificial freshwater medium lacking nitrate and sulfate was developed based on the  
101 pore water composition of Lake Matano sediments (S.A. Crowe and D.A. Fowle, unpublished  
102 work). The medium contained 825 µM MgCl<sub>2</sub>, 550 µM CaCO<sub>3</sub>, 3 mM NaHCO<sub>3</sub>, 3.5 µM  
103 K<sub>2</sub>HPO<sub>4</sub>, 5 µM Na<sub>2</sub>HPO<sub>4</sub>, 225 µM NH<sub>4</sub>Cl, 1 µM CuCl<sub>2</sub>, 1.5 µM Na<sub>2</sub>MoO<sub>4</sub>, 2.5 µM CoCl<sub>2</sub>, 23  
104 µM MnCl<sub>2</sub>, 4 µM ZnCl<sub>2</sub>, 9.4 µM FeCl<sub>3</sub> and 3 mM Na<sub>2</sub>NTA, 0.07 µM vitamin B<sub>12</sub>, 0.4 µM biotin,  
105 and 68.5 µM thiamine. Filter-sterilized vitamin solutions were added after autoclaving.  
106 Ferrihydrite (Fe(OH)<sub>3</sub>) and goethite (FeOOH) were synthesized as described in Schwertmann &  
107 Cornell (1991) and added to enrichments to 10 mM as described below.

108

### 109 **Inoculation of enrichment and amendments**

110 The sediment was pre-treated for 36 days at 30°C in 100% N<sub>2</sub> headspace to deplete endogenous  
111 organic carbon, electron donors, and reactive electron acceptors. After pre-treatment, sediment  
112 from the 0-5 cm depth layer was inoculated in a ratio of sediment to medium of 1:5 (v/v) in an  
113 anoxic chamber (97% N<sub>2</sub> and 3% H<sub>2</sub>; Coy Laboratory Products, Grass Lake, MI, USA).  
114 Sediment slurry (35 mL) was aliquoted into 70 mL sterile serum bottles, stoppered with sterile  
115 butyl stoppers (Geo-Microbial Technologies, Ochelata, OK, USA; pre-boiled in 0.1 N NaOH),  
116 and crimped with aluminum seals. Ferric iron was added either as ferrihydrite or goethite to 10  
117 mM. Bottles were purged with 99.99% N<sub>2</sub> for 1 hr, and CH<sub>4</sub> amendments were injected with 10  
118 mL 99.99% CH<sub>4</sub> and 5 mL 99% <sup>13</sup>CH<sub>4</sub> (Cambridge Isotope Laboratories, Tewksbury, MA,  
119 USA). Controls were autoclaved at 121°C for 1 hr on day 0 and again on day 6 of the 1°  
120 enrichment. All treatments were duplicated, and bottles were incubated in the dark at 30°C with  
121 shaking at 200 rpm.

122 After 50 days, the volume of all cultures was reduced to 5 mL, and 30 mL of fresh media  
123 was added to each bottle, constituting a 6-fold dilution. These 2° enrichments were amended  
124 with an additional 10 mM of either ferrihydrite or goethite. All bottles were purged with 99.99%  
125 N<sub>2</sub> for 1 hr, and all bottles except N<sub>2</sub> controls were injected with 8 mL 99.99% CH<sub>4</sub> and 2 mL  
126 99% <sup>13</sup>CH<sub>4</sub>. Controls were autoclaved again at 121°C for 1 hr. DL-Methionine (10 μM) was  
127 added as a sulfur source. After 303 days, cultures were diluted 10-fold with fresh media into new  
128 serum bottles (3° enrichment) with the same substrate and headspace composition as the 2°  
129 enrichment. A schematic of the incubation and dilutions is shown at the top of Figures 1-3.

130

131 **HCl-extractable Fe<sup>2+</sup> and Fe<sup>3+</sup> and soluble Fe<sup>2+</sup>**

132 Samples were taken from each bottle in the anoxic chamber using a 22-gauge needle and plastic  
133 syringe. Plasticware was stored in the anoxic chamber for at least 24 hr to minimize O<sub>2</sub> sample  
134 contamination. For HCl-extractable Fe<sup>2+</sup> analyses, 100 μL of sediment slurry was extracted with  
135 400 μL 0.5 N HCl in the dark for 1 hr, followed by centrifugation at 10,000 x g for 1 min,  
136 injection of 10 μL of supernatant into 990 μL of 10 mM FerroZine reagent in 46 mM HEPES  
137 (pH 8.3), and measurement of absorbance at 562 nm (Stookey, 1970). For HCl-extractable Fe<sup>3+</sup>,  
138 100 μL of sediment slurry was incubated overnight in 0.5 N HCl and 0.25 M NH<sub>2</sub>OH-HCl in the  
139 dark, followed by centrifugation and measurement as above, and subtraction of HCl-extractable  
140 Fe<sup>2+</sup> as in Kostka & Luther (1994).

141

#### 142 **Methane oxidation**

143 Samples were collected for δ<sup>13</sup>C-DIC analysis by 0.2 μm membrane filtration of medium into  
144 crimp top autosampler vials (Thermo Scientific National Target LoVial) and analysis as  
145 described in Brandes (2009). Rates of <sup>13</sup>CH<sub>4</sub> oxidation to <sup>13</sup>C-DIC were calculated over the linear  
146 period of δ<sup>13</sup>C-DIC increase based on the method in Scheller et al. (2016). First, the δ<sup>13</sup>C-DIC  
147 values were converted into fractional abundances (<sup>13</sup>F = (<sup>13</sup>C/<sup>12</sup>C + <sup>13</sup>C)), and then DIC production  
148 from CH<sub>4</sub> oxidation was calculated using the following formula:

$$149 \quad \Delta[\text{DIC}] = ([\text{DIC}]_n(^{13}\text{F}_n)) - ([\text{DIC}]_0(^{13}\text{F}_0)) / ^{13}\text{F}_{\text{CH}_4}$$

150 Where [DIC]<sub>n</sub> and <sup>13</sup>F<sub>n</sub> are equal to the total DIC concentration (mM) and fractional abundance  
151 of <sup>13</sup>C in the DIC at time n respectively. [DIC]<sub>0</sub> and <sup>13</sup>F<sub>0</sub> are the total DIC concentration (mM)  
152 and fractional abundance of DIC at time 0 respectively, and <sup>13</sup>F<sub>CH<sub>4</sub></sub> is the fractional abundance of  
153 <sup>13</sup>C in the CH<sub>4</sub>.

154

155 **Methane in headspace**

156 Headspace (50  $\mu$ L) was sampled using a gastight syringe and injected into a gas chromatograph  
157 (SRI Instruments 8610C, Torrance, CA, USA) with a HayeSep N column and flame ionization  
158 detector to measure headspace CH<sub>4</sub> concentrations. A CH<sub>4</sub> standard (1000 ppm, Airgas, USA)  
159 was used for calibration.

160

161 **16S rRNA gene amplicon sequencing**

162 Samples (2 mL) of sediment used for inoculating incubations (hereafter, “sediment inoculum”)  
163 were taken in February 2015 (prior to pre-treatment) and after incubation for 15 days (1°  
164 enrichment), 72 days (2° enrichment) and 469 days (3° enrichment). Nucleic acid was extracted  
165 and purified using a PowerSoil Isolation Kit following the manufacturer’s protocol (Catalog #  
166 12888; MO BIO, Carlsbad, CA, USA) and UltraClean® 15 Purification Kit (MO BIO  
167 Laboratories, Carlsbad, CA). 16S rRNA gene amplicons were synthesized from extracted DNA  
168 with V4 region-specific barcoded primers F515 and R806 (Caporaso et al., 2011) appended with  
169 Illumina-specific adapters according to Kozich et al. (2013) using a C1000 Touch Thermocycler  
170 (Bio-Rad, Hercules, CA) and QIAGEN Taq PCR Master Mix (QIAGEN, Venlo, Netherlands).  
171 Thermal cycling conditions were as follows: initial denaturing at 94°C (5 min), 35 cycles of  
172 denaturing at 94°C (40 sec), primer annealing at 55°C (40 sec), and primer extension at 68°C (30  
173 sec). Amplicons were checked for correct size (~400 bp) on a 1% agarose gel and purified using  
174 Diffinity RapidTips (Diffinity Genomics, West Henrietta, NY, USA). Amplicon concentrations  
175 were determined fluorometrically on a Qubit™ (ThermoFisher Scientific, Waltham,  
176 Massachusetts, USA). Amplicons were pooled at equimolar concentrations (4 nmol), and  
177 sequenced on an Illumina MiSeq running MiSeq Control software v.2.4.0.4 using a 500 cycle



178 MiSeq reagent kit v2 with a 5% PhiX genomic library control, as described by Kozich et al.  
179 (2013). Sequences were deposited as NCBI accession numbers SAMN04532568-04532641 and  
180 SAMN05915184-05915222.

181

## 182 **16S rRNA gene amplicon sequence analysis**

183 Demultiplexed amplicon read pairs were quality trimmed with Trim Galore (Babraham  
184 Bioinformatics) using a base Phred33 score threshold of Q25 and a minimum length cutoff of  
185 100 bp. Reads were then analyzed using mothur (Schloss et al., 2009) following its MiSeq  
186 standard operating procedure. High quality paired reads were merged and screened to remove  
187 sequences of incorrect length and those with high numbers of ambiguous base calls. Merged  
188 reads were dereplicated and aligned to the ARB SILVA database (release 123; available at  
189 [http://www.mothur.org/wiki/Silva\\_reference\\_alignment](http://www.mothur.org/wiki/Silva_reference_alignment)). Sequences with incorrect alignment  
190 and those with homopolymers longer than 8bp were filtered out. Unique sequences and their  
191 frequency in each sample were identified and then a pre-clustering algorithm was used to further  
192 de-noise sequences within each sample. Sequences were then chimera checked using UCHIME  
193 (Edgar et al., 2011). Reads were then clustered into OTUs at 97% similarity based on  
194 uncorrected pairwise distance matrices. OTUs were classified using SILVA reference taxonomy  
195 database (release 123, available at [http://www.mothur.org/wiki/Silva\\_reference\\_files](http://www.mothur.org/wiki/Silva_reference_files)). Chao 1  
196 (species richness), phylogenetic diversity, and Shannon index (species evenness) estimates were  
197 generated using mother after normalization to 4000 sequences per sample.

198

## 199 **RESULTS**

### 200 **Iron reduction**

201 *1° enrichment.* Over the first 10 days of incubation, HCl-extractable  $\text{Fe}^{2+}$  increased from 10 to 25  
202 mM in ferrihydrite treatments (Fig. 1a) and from 10 to 20 mM in goethite treatments (Fig. 1b).  
203 From day 6 to 10, HCl-extractable  $\text{Fe}^{3+}$  (7 and 12 mM in ferrihydrite and goethite treatments,  
204 respectively) was completely consumed in all bottles except autoclaved controls with ferrihydrite  
205 (data not shown). Iron reduction rates were identical with and without  $\text{CH}_4$  (Fig. 1a, b). Initial  
206 autoclaving did not suppress  $\text{Fe}^{3+}$  reduction. A second round of autoclaving on day 6 slightly  
207 suppressed further activity. From day 10-28, HCl-extractable  $\text{Fe}^{2+}$  fluctuated in ferrihydrite  
208 treatments (Fig. 1a) and declined slightly in goethite treatments (Fig. 1b). Soluble  $\text{Fe}^{2+}$  was  
209 consistently <1% of HCl-extractable  $\text{Fe}^{2+}$ , and sediment-free controls did not reduce  $\text{Fe}^{3+}$  (data  
210 not shown).

211 *2° enrichment.* After 1:6 dilution and 10 mM ferrihydrite addition on day 50, HCl-extractable  
212  $\text{Fe}^{2+}$  increased from 3 to 4 mM over the first two days, and then remained constant through the  
213 final time point (day 497) in bottles with and without added  $\text{CH}_4$  (Fig. 1a). After 10 mM goethite  
214 addition on day 50, HCl-extractable  $\text{Fe}^{2+}$  increased from 2 to 3 mM after a two-day lag period.  
215 Thereafter, HCl-extractable  $\text{Fe}^{2+}$  rose to 4 mM by day 497 in goethite treatments with added  
216  $\text{CH}_4$ ; without  $\text{CH}_4$ , HCl-extractable  $\text{Fe}^{2+}$  dropped back to 2 mM (Fig. 1b). Autoclaved controls  
217 had no activity. Black magnetic minerals formed in all ferrihydrite treatments except autoclaved  
218 controls (Fig 1a). No magnetic minerals formed in goethite treatments (Fig. 1b).

219 *3° enrichment.* After 1:10 dilution and addition of 10 mM ferrihydrite on day 352, HCl-  
220 extractable  $\text{Fe}^{2+}$  doubled in the first week in  $\text{N}_2$  treatments and bottle  $\text{CH}_4$ -1 (Fig. 1a). Bottle  
221  $\text{CH}_4$ -2 displayed similar activity after a two-week lag period. After an additional 100 days, HCl-  
222 extractable  $\text{Fe}^{2+}$  had increased to 2 mM in  $\text{CH}_4$  treatments and 1 mM in the  $\text{N}_2$  treatment by day  
223 466. Goethite treatments had minimal activity after the first week of 3° enrichment (Fig. 1b).

224 Autoclaved controls had no activity. As in the 2° enrichment, magnetic minerals formed in the  
225 presence of ferrihydrite (Fig. 1a), but not goethite (Fig. 1b).

226

### 227 **Methane production**

228 Goethite treatments consistently displayed higher CH<sub>4</sub> production than those with ferrihydrite  
229 (Fig. 2). Methanogenesis started during the initial period of Fe<sup>3+</sup> reduction, and stopped after  
230 HCl-extractable Fe<sup>3+</sup> was completely consumed in the 1° enrichment (day 10). Methanogenesis  
231 continued throughout the 3° enrichment. Negligible CH<sub>4</sub> was produced in treatments with  
232 ferrihydrite, except for bottle N<sub>2</sub>-2 in the 3° enrichment.

233

### 234 **Methane oxidation**

235 *1° enrichment.* <sup>13</sup>C incorporation into DIC began on day 6 in both ferrihydrite and goethite  
236 treatments and continued throughout the 1° enrichment (Fig. 3a,b). Ferrihydrite treatments  
237 showed lower <sup>13</sup>C enrichment of the DIC pool but higher total DIC production (totaling to 1.7  
238 and 1.1 μM CH<sub>4</sub> d<sup>-1</sup> for bottles 1 and 2, respectively) than goethite treatments, which had greatest  
239 δ<sup>13</sup>C enrichment, but minimal DIC production (0.2 and 0.8 μM CH<sub>4</sub> d<sup>-1</sup> for bottles 1 and 2,  
240 respectively). Autoclaved controls showed neither <sup>13</sup>C incorporation nor DIC production.

241 *2° enrichment.* Both ferrihydrite treatments displayed <sup>13</sup>C enrichment (Fig. 3a), but declined in  
242 DIC, precluding calculation of CH<sub>4</sub> oxidation rates. Initial pH of 8 declined to 7.6, 6.7 and 6 in  
243 the autoclaved, N<sub>2</sub> and CH<sub>4</sub> treatments, respectively. DIC in goethite treatments with CH<sub>4</sub>  
244 dropped to undetectable values within three weeks, suggesting sampling or analytical error,  
245 which precluded accurate isotopic measurement at these time points. These data are thus not  
246 considered further. Autoclaved and N<sub>2</sub> controls did not show pH changes.

247  $3^\circ$  enrichment. Bottle CH<sub>4</sub>-2 with ferrihydrite was the only treatment with significant <sup>13</sup>C  
248 incorporation into DIC over the first 15 days (Fig. 3a). DIC also increased over the same interval  
249 in both ferrihydrite-amended bottles; calculated CH<sub>4</sub> oxidation rates were 32 and 7 μM d<sup>-1</sup> in  
250 bottle 1 and 2, respectively. The pH dropped from 8.2 to 7.1 and 7.9 in bottles 1 and 2,  
251 respectively, over the first 15 days. By day 470, <sup>13</sup>C enrichment and DIC concentrations in both  
252 ferrihydrite-amended bottles had returned to a level similar to that at the start of the  $3^\circ$   
253 enrichment. Autoclaved controls did not exhibit any change in DIC and pH. Goethite treatments  
254 had initial DIC concentrations (3-5 mM) higher than those in previous enrichments. In the  
255 goethite-amended autoclaved controls and bottle CH<sub>4</sub>-1, DIC concentrations dropped over the  $3^\circ$   
256 enrichment. Only goethite-amended bottle CH<sub>4</sub>-2 increased in DIC, without concurrent <sup>13</sup>C  
257 enrichment.

258

### 259 **Microbial taxonomy**

260 *Inoculum*. 16S rRNA gene amplicons from the sediment inoculum were dominated by those  
261 classified as Bathyarchaeota (25%), formerly Miscellaneous Crenarchaeotal Group (MCG; Fig.  
262 4) and unclassified Archaea (11%).

263  $1^\circ$  enrichment. After 15 days of incubation with Fe<sup>3+</sup> substrates, species, richness, evenness and  
264 phylogenetic diversity decreased relative to the inoculum in all treatments (Fig. 4).  
265 Geobacteraceae (Deltaproteobacteria) became dominant (22-36%) in all ferrihydrite treatments  
266 (Fig. 4a); the dominant OTU had 97% similarity to *Geothermobacter* sp. Ferrihydrite-amended  
267 bottle CH<sub>4</sub>-1 was enriched in the Betaproteobacteria, specifically Comamonaceadeae (17%) and  
268 Rhodocyclaceae (9%; Fig. 4a). Bathyarchaeota persisted in goethite treatments (11-25%; Fig.  
269 4b).

270 2° enrichment. By day 72, all treatments had lower species richness, phylogenetic diversity, and  
271 evenness. Unclassified Desulfuromonadales dominated both ferrihydrite and goethite enrichments  
272 (34-68% and 39-53% with ferrihydrite and goethite, respectively). The dominant OTU had 98%  
273 similarity to *Geobacter hephaestius*. Bathyarchaeota were depleted compared to the 1°  
274 enrichment (Fig. 4). Geobacteraceae declined in ferrihydrite enrichments (2-18%; Fig. 4a).  
275 Campylobacteraceae (Epsilonproteobacteria), which was insignificant in the inoculum and the 1°  
276 enrichment, comprised 23-40% of sequences in goethite treatments with CH<sub>4</sub>; the dominant OTU  
277 had 98% similarity to *Sulfurospirillum barnesii* (Fig. 4b). The most abundant methanogenic  
278 Euryarchaeota order, Methanobacteriaceae, comprised 1-2% and 6-7% of sequences in  
279 ferrihydrite and goethite treatments, respectively the dominant OTU has 100% similarity to  
280 *Methanobacterium flexile*.

281 3° enrichment. By day 469, species richness, phylogenetic diversity, and evenness were even  
282 lower than in the 2° enrichment (Fig. 4a,b). Unclassified Desulfuromonadales dominated goethite  
283 treatments (32-76%; Fig. 4b), but comprised only 18-38% of ferrihydrite treatments. The  
284 dominant OTU also had 98% identity to *Geobacter hephaestius/lovleyi*, as in the 2° enrichment.  
285 Rhodocyclaceae were more abundant in ferrihydrite treatments with CH<sub>4</sub> (14-15%) than with N<sub>2</sub>  
286 (2-4%; Fig 4a); the dominant OTU had 100% similarity to *Azospira oryzae/Dechlorosoma*  
287 *suillum*. Peptococcaceae (Firmicutes) were most abundant in bottle CH<sub>4</sub>-2 with ferrihydrite  
288 (30%); the dominant OTU had 96% similarity to uncultured members of the genus *Thermincola*.  
289 Syntrophaceae (Deltaproteobacteria) were enriched in all ferrihydrite treatments (11-16%) and  
290 goethite treatments with N<sub>2</sub> (8-15%); the dominant OTU had 97% similarity to *Smithella*  
291 *propionica*. Methanobacteriaceae comprised 1-4% of sequences in goethite treatments and were

292 absent from ferrihydrite treatments; as in the 2° enrichment, the dominant OTU had 100%  
293 identity to *Methanobacterium flexile*.

294

## 295 **DISCUSSION**

### 296 **Rates of Fe<sup>3+</sup> reduction in long-term ferruginous sediment incubations**

297 Initial rates of HCl-extractable Fe<sup>2+</sup> production (~1-2 mM d<sup>-1</sup>) in the 1° enrichment were similar  
298 to those from freshwater wetlands (Roden & Wetzel, 2002 ; Jensen et al., 2003 ; Kostka et al.,  
299 2002). Activity declined with each successive transfer (0.4 and 0.08 mM d<sup>-1</sup> for 2° and 3°  
300 enrichments, respectively), despite replenishment of Fe<sup>3+</sup> substrates. Declining Fe<sup>3+</sup> reduction  
301 rates through the incubation period likely reflects limitation by availability of organic carbon, the  
302 most thermodynamically favorable electron donor, which was diluted during each successive  
303 transfer of the lake sediment. The next two most thermodynamically favorable electron donors  
304 are H<sub>2</sub> and CH<sub>4</sub>. Hydrogen could have been supplied by fermenters such as Syntrophaceae, but  
305 would ultimately still require a source of organic carbon. Methane as an electron donor for  
306 microbial Fe<sup>3+</sup> reduction is thermodynamically favorable and coupling of Fe<sup>3+</sup> reduction to CH<sub>4</sub>  
307 oxidation has been long suspected as a viable microbial metabolism (Caldwell et al., 2008 ;  
308 Zehnder & Brock, 1980). In our 2° and 3° enrichments, CH<sub>4</sub> addition resulted in higher Fe<sup>2+</sup>  
309 yield with goethite and ferrihydrite, respectively. This could be the result of (a) methanotrophic  
310 growth resulting in production of organics which is used by heterotrophic Fe<sup>3+</sup> reducers or (b)  
311 the direct coupling of CH<sub>4</sub> oxidation and Fe<sup>3+</sup> reduction. No difference in initial Fe<sup>2+</sup> production  
312 rates however, suggests that initial CH<sub>4</sub> oxidation was driven by another electron donor.

313 Higher Fe<sup>3+</sup> reduction rates were maintained on ferrihydrite than goethite, consistent with  
314 the higher energetic yield of ferrihydrite vs. goethite as well as its typically greater surface-area.

315 Formation of magnetic minerals was likely due to adsorption of  $\text{Fe}^{2+}$  onto ferrihydrite followed  
316 by solid-state conversion of ferrihydrite to magnetite (Hansel et al., 2003). Since the HCl-  
317 extraction method does not dissolve magnetite and magnetite-adsorbed  $\text{Fe}^{2+}$  (Poulton & Canfield,  
318 2005), it is possible that the  $\text{Fe}^{3+}$  reduction observed in the study is an underestimation of total  
319 activity.

320

### 321 **$\text{Fe}^{3+}$ oxide mineralogy controls methane production and methanogen taxonomy**

322 Our observation of higher rates of methanogenesis in goethite vs. ferrihydrite amendments is  
323 consistent with prior results showing that bacteria that reduce ferrihydrite better outcompete  
324 methanogenic archaea for  $\text{H}_2$  and acetate than those that reduce goethite and other more  
325 crystalline  $\text{Fe}^{3+}$  oxides (Lovley & Phillips, 1987 ; Lovley & Goodwin, 1988 ; Zhou et al., 2014 ;  
326 Hori et al., 2010 ; Roden & Wetzel, 1996). This outcompetition is also broadly supported by  
327 taxonomic shifts. In particular, anaerobic heterotrophs such as *Geothermobacter sp.* (Kashefi et  
328 al., 2003) enriched in ferrihydrite treatments by day 15 may have outcompeted other microbes  
329 for organic carbon sources.

330 Goethite treatments contained higher abundances of Methanobacteriaceae (0.1-1% and 1-  
331 4% on days 15 and 469, respectively) than ferrihydrite treatments ( $\leq 0.1\%$  throughout),  
332 suggesting that  $\text{CH}_4$  in goethite treatments came from the substrates used by  
333 Methanobacteriaceae ( $\text{H}_2/\text{CO}_2$ , formate, or CO). The ferrihydrite treatment (bottle 2) that  
334 produced  $\text{CH}_4$  by day 469 contained 3% Methanosaetaceae, which produce  $\text{CH}_4$  from acetate, or  
335 from  $\text{H}_2/\text{CO}_2$  via direct interspecies electron transfer with *Geobacter* (Rotaru et al., 2014). The  
336 most dominant OTU had 98% similarity to *Methanosaeta concilii*, in agreement with  
337 observations from the Lake Matano water column (Crowe et al., 2011). It is also possible that

338 archaea could be directly involved in  $\text{Fe}^{3+}$  reduction (Vargas et al., 1998 ; Sivan et al., 2016),  
339 although the lack of methanogenesis in ferrihydrite treatments does not support this.

340

### 341 **$\text{Fe}^{3+}$ -dependent $\text{CH}_4$ oxidation**

342 Enrichments were established under conditions thought favorable for  $\text{Fe}^{3+}$ -dependent  $\text{CH}_4$   
343 oxidation (e.g.  $\text{Fe}^{3+}$  oxides and  $\text{CH}_4$  as the most abundant electron acceptors and donors,  
344 respectively). Incorporation of  $^{13}\text{CH}_4$  into DIC overlapped with the second phase of  $\text{Fe}^{3+}$   
345 reduction (days 6-10) in the 1° enrichment but continued after  $\text{Fe}^{3+}$  reduction stopped at day 10,  
346 suggesting an alternative electron acceptor for  $\text{CH}_4$  oxidation. Moreover, the stoichiometry of  
347  $\text{CH}_4$  oxidized to  $\text{Fe}^{2+}$  reduced in the 1° enrichment was significantly lower than predicted (1:8;  
348 Fig. 5). Low to negative rates of DIC production in the 2° enrichment complicated measurements  
349 of  $\text{CH}_4$  oxidation. In the 3° enrichment, significant DIC production and  $^{13}\text{C}$  incorporation was  
350 observed in the first 15 days in bottle  $\text{CH}_4$ -2 with ferrihydrite, but thereafter isotopic values  
351 returned to background levels. The apparent spike in  $\text{CH}_4$  oxidation was unlikely coupled to  $\text{Fe}^{3+}$   
352 reduction (Fig. 5). However, over the same time period, bottle  $\text{CH}_4$ -1 oxidized methane and  
353 reduced iron in a ratio close to the 1  $\text{CH}_4$  oxidized: 8  $\text{Fe}^{3+}$  reduced predicted for Fe-AOM (Fig.  
354 5). Goethite-amended cultures were also close to the 1:8 line, albeit with extremely low  $\text{CH}_4$   
355 oxidation and  $\text{Fe}^{3+}$  reduction rates. By the end of 3° enrichment (day 466),  $\text{CH}_4$ -amended  
356 treatments produced twice as much HCl-extractable  $\text{Fe}^{2+}$  as  $\text{N}_2$  treatments, suggesting that  $\text{Fe}^{3+}$   
357 reduction was stimulated by  $\text{CH}_4$ . However, without evidence for  $\text{CH}_4$  oxidation data during this  
358 time interval, we cannot attribute this stimulation to Fe-AOM. It is important to note that these  
359  $\text{CH}_4$  oxidation rates may be underestimates due to the low levels of DIC production in our  
360 experiments. This suggests that high levels of autotrophy or  $\text{CO}_2$  reduction to  $\text{CH}_4$  may have



361 been taking place in our enrichments. In addition, decreasing pH values in some of our  
362 enrichments could have pulled DIC into headspace CO<sub>2</sub> subsequently lowering DIC  
363 concentrations.

364 Only minor community composition differences were observed between CH<sub>4</sub>- and N<sub>2</sub>-  
365 cultures; by day 469, the only taxon that was more abundant in the CH<sub>4</sub> vs. N<sub>2</sub> treatments was the  
366 betaproteobacterium *Azospira oryzae/Dechlorosoma suillum*, a member of the Rhodocyclaceae  
367 family. The potential role of this microbe in CH<sub>4</sub> cycling remains unclear, as laboratory cultures  
368 of this species are not known to oxidize CH<sub>4</sub>. It is also possible that the growth of novel  
369 organisms capable of high rates of Fe<sup>3+</sup>-dependent CH<sub>4</sub> oxidation was inhibited by other  
370 unidentified factors, potentially related to the batch-style incubations, the use of butyl rubber  
371 stoppers (Niemann et al., 2015), or the lack of a critical substrate in the enrichment medium.

372

### 373 **Effect of Fe<sup>3+</sup> oxide and carbon substrates on microbial community diversity**

374 The microbial community underwent multiple shifts over the 500-day incubation, with an overall  
375 decrease in species richness, species evenness, and phylogenetic diversity over the course of  
376 incubation. This was likely in response to declining organic carbon and alternative electron  
377 donors. By the 3<sup>o</sup> enrichment, species evenness was consistently lower in each goethite-amended  
378 treatment than in the respective ferrihydrite-amended treatment. This could mean that the greater  
379 energetic yield of ferrihydrite reduction fosters higher diversity. Alternatively, the higher  
380 reactivity of ferrihydrite may allow it to be utilized by more organisms than goethite.

381 All of the most enriched taxa have relatives that in laboratory cultures reduce Fe<sup>3+</sup>.  
382 Within those taxa, the most abundant OTUs were closely related to organisms capable of Fe<sup>3+</sup>  
383 reduction (*Geothermobacter sp.*, *Geobacter hephaestius/Geobacter lovleyi*, *Thermincola sp.*, and

384 *Sulfurospirillum barnesii*) (Kashefi et al., 2003 ; Zavarzina et al., 2007 ; Stolz et al., 1999). It is  
385 important to note that all taxa enriched in our experiments comprised  $\leq 0.1\%$  of the inoculum  
386 community. Desulfuromonadales was the only metal-reducing taxon that was continuously  
387 present in all enrichments (3-11%, 34-53%, and 18-76% in the inoculum, 1<sup>o</sup>, 2<sup>o</sup>, and 3<sup>o</sup>  
388 enrichment respectively). Other taxa significantly differed in their abundance over the course of  
389 incubation. Geobacteraceae was enriched at day 15 with ferrihydrite (22-36%) but had declined  
390 in abundance by day 72 (8-18%). Other taxa including Rhodocyclaceae and Peptococcaceae,  
391 were enriched in the presence of ferrihydrite at day 469. In goethite treatments,  
392 Campylobacteraceae (23-40%) were enriched at day 72, but did not make up a significant  
393 portion of the community at day 469. The succession of different metal-reducing taxa may be  
394 due to the changing availability of electron donors (e.g. H<sub>2</sub> and organic C). Enrichment of  
395 Syntrophaceae, known for their syntrophic fermentative interactions, suggests the establishment  
396 of syntrophy in the 3<sup>o</sup> enrichment in response to depletion of electron donors.

397

### 398 **Geobiological implications**

399 The anaerobic microbial metabolisms studied here – Fe<sup>3+</sup> reduction and hydrogenotrophic  
400 methanogenesis – were likely of great importance to the Archean carbon cycle (Konhauser et al.,  
401 2005 ; Posth et al., 2013 ; Johnson et al., 2008). The severe organic carbon limitation in our  
402 incubations likely mimics conditions of the Archean ocean with relatively low amounts of  
403 primary production and biopolymer degradation as well as the absence of complex organic  
404 substances supplied by multicellular eukaryotes (Knoll et al., 2016 ; Farquhar et al., 2011). Our  
405 results point to a mineralogical control on Fe<sup>3+</sup>-reduction, methanogenesis, and microbial  
406 community composition and diversity. Rapid sedimentation of amorphous Fe<sup>3+</sup> phases like

407 ferrihydrite could have supported sediments with diverse communities of  $\text{Fe}^{3+}$ -reducing  
408 organisms that could have outcompeted other taxa such as methanogens for limited carbon and  
409 nutrients. Conversely, slow deposition and aging of ferrihydrite to goethite could have limited  
410 both the abundance and diversity of  $\text{Fe}^{3+}$ -reducing organisms, allowing for the establishment of a  
411 methanogenic community. Therefore, we posit that methanogenesis rates in the Archean would  
412 have depended on the relative abundance of the  $\text{Fe}^{3+}$  phases and their distributions in marine  
413 sediments. Sediments below shallow water columns were likely fed by abundant amorphous  $\text{Fe}^{3+}$   
414 from photoferrotrophic activity. In the open ocean, organic carbon and  $\text{Fe}^{3+}$  would have been  
415 significantly consumed before reaching sediments, leaving only more crystalline iron phases that  
416 are difficult to reduce. Importantly, the role of  $\text{Fe}^{3+}$ -driven  $\text{CH}_4$  oxidation appears limited given  
417 our experimental results, though we cannot rule out this pathway given that some of our data  
418 suggest it may operate at low rates. Overall, our results support a model for an Archean  
419 ferruginous biosphere supported by spatially segregated habitats of bacterial  $\text{Fe}^{3+}$  reduction from  
420 reactive  $\text{Fe}^{3+}$  oxides, and archaeal methanogenesis in the presence of less reactive  $\text{Fe}^{3+}$  phases.  
421 Rates of Fe deposition, aging, and recrystallization may thus have played an important role in  
422 regulating the preservation of sedimentary  $\text{Fe}^{3+}$ , the production of methane, and the ecology and  
423 diversity of the Archean biosphere.

424 **Acknowledgements**

425 This research was funded by NASA Exobiology grant NNX14AJ87G. Support was also  
426 provided by a Center for Dark Energy Biosphere Investigations (NSF-CDEBI OCE-0939564)  
427 small research grant, and supported by the NASA Astrobiology Institute (NNA15BB03A). SAC  
428 was supported through NSERC CRC, CFI, and Discovery grants. We thank Miles Mobley and  
429 Johnny Striepen for assistance with laboratory incubations, and Nadia Szeinbaum, Liz Percak-  
430 Dennett, Martial Taillefert, and Joel Kostka for helpful discussions.

431 **References**

- 432 Amos R, Bekins B, Cozzarelli I, Voytek M, Kirshtein J, Jones E, Blowes D (2012) Evidence for  
433 iron-mediated anaerobic methane oxidation in a crude oil-contaminated aquifer.  
434 *Geobiology*, **10**, 506-517.
- 435 Battistuzzi FU, Feijao A, Hedges SB (2004) A genomic timescale of prokaryote evolution:  
436 insights into the origin of methanogenesis, phototrophy, and the colonization of land.  
437 *BMC Evolutionary Biology*, **4**, 44.
- 438 Beal EJ, House CH, Orphan VJ (2009) Manganese- and iron-dependent marine methane  
439 oxidation. *Science*, **325**, 184-187.
- 440 Brandes JA (2009) Rapid and precise  $\delta^{13}\text{C}$  measurement of dissolved inorganic carbon in  
441 natural waters using liquid chromatography coupled to an isotope ratio mass  
442 spectrometer. *Limnology and Oceanography: Methods*, **7**, 730-739.
- 443 Caldwell SL, Laidler JR, Brewer EA, Eberly JO, Sandborgh SC, Colwell FS (2008) Anaerobic  
444 oxidation of methane: mechanisms, bioenergetics, and the ecology of associated  
445 microorganisms. *Environmental science & technology*, **42**, 6791-6799.
- 446 Caporaso JG, Lauber CL, Walters WA, Berg-Lyons D, Lozupone CA, Turnbaugh PJ, Fierer N,  
447 Knight R (2011) Global patterns of 16S rRNA diversity at a depth of millions of  
448 sequences per sample. *Proceedings of the National Academy of Sciences*, **108**, 4516-  
449 4522.
- 450 Craddock PR, Dauphas N (2011) Iron and carbon isotope evidence for microbial iron respiration  
451 throughout the Archean. *Earth and Planetary Science Letters*, **303**, 121-132.
- 452 Crowe S, Katsev S, Leslie K, Sturm A, Magen C, Nomosatryo S, Pack M, Kessler J, Reeburgh  
453 W, Roberts J (2011) The methane cycle in ferruginous Lake Matano. *Geobiology*, **9**, 61-  
454 78.
- 455 Crowe S, Roberts J, Weisener C, Fowle D (2007) Alteration of iron-rich lacustrine sediments  
456 by dissimilatory iron-reducing bacteria. *Geobiology*, **5**, 63-73.
- 457 Crowe SA, Jones C, Katsev S, Magen CD, O'Neill AH, Sturm A, Canfield DE, Haffner GD,  
458 Mucci A, Sundby BR (2008a) Photoferrotrophs thrive in an Archean Ocean analogue.  
459 *Proceedings of the National Academy of Sciences*, **105**, 15938-15943.
- 460 Crowe SA, O'Neill AH, Katsev S, Hehanussa P, Haffner GD, Sundby B, Mucci A, Fowle DA  
461 (2008b) The biogeochemistry of tropical lakes: A case study from Lake Matano,  
462 Indonesia. *Limnology Oceanography*, **53**, 319-331.
- 463 Edgar RC, Haas BJ, Clemente JC, Quince C, Knight R (2011) UCHIME improves sensitivity  
464 and speed of chimera detection. *Bioinformatics*, **27**, 2194-2200.

- 465 Egger M, Rasigraf O, Sapart CLJ, Jilbert T, Jetten MS, Ročkmann T, Van Der Veen C,  
466 Bañdañ N, Kartal B, Ettwig KF (2015) Iron-mediated anaerobic oxidation of methane  
467 in brackish coastal sediments. *Environmental Science & Technology*, **49**, 277-283.
- 468 Farquhar J, Zerkle AL, Bekker A (2011) Geological constraints on the origin of oxygenic  
469 photosynthesis. *Photosynthesis Research*, **107**, 11-36.
- 470 Fournier GP, Gogarten JP (2008) Evolution of acetoclastic methanogenesis in *Methanosarcina*  
471 via horizontal gene transfer from cellulolytic *Clostridia*. *Journal of Bacteriology*, **190**,  
472 1124-1127.
- 473 Fu L, Li S-W, Ding Z-W, Ding J, Lu Y-Z, Zeng RJ (2016) Iron reduction in the  
474 DAMO/*Shewanella oneidensis* MR-1 coculture system and the fate of Fe(II). *Water*  
475 *Research*, **88**, 808-815.
- 476 Hansel CM, Benner SG, Neiss J, Dohnalkova A, Kukkadapu RK, Fendorf S (2003) Secondary  
477 mineralization pathways induced by dissimilatory iron reduction of ferrihydrite under  
478 advective flow. *Geochimica et Cosmochimica Acta*, **67**, 2977-2992.
- 479 Hansen JW, Thamdrup B, Jørgensen BB (2000) Anoxic incubation of sediment in gas-tight  
480 plastic bags: a method for biogeochemical process studies. *Marine Ecology Progress*  
481 *Series*, **208**, 273-282.
- 482 Haqq-Misra JD, Domagal-Goldman SD, Kasting PJ, Kasting JF (2008) A revised, hazy methane  
483 greenhouse for the Archean Earth. *Astrobiology*, **8**, 1127-1137.
- 484 Hori T, Müller A, Igarashi Y, Conrad R, Friedrich MW (2010) Identification of iron-reducing  
485 microorganisms in anoxic rice paddy soil by <sup>13</sup>C-acetate probing. *The ISME journal*, **4**,  
486 267-278.
- 487 Jensen MM, Thamdrup B, Rysgaard S, Holmer M, Fossing H (2003) Rates and regulation of  
488 microbial iron reduction in sediments of the Baltic-North Sea transition.  
489 *Biogeochemistry*, **65**, 295-317.
- 490 Johnson CM, Beard BL, Roden EE (2008) The iron isotope fingerprints of redox and  
491 biogeochemical cycling in modern and ancient Earth. *Annual Reviews of Earth and*  
492 *Planetary Sciences*, **36**, 457-493.
- 493 Kappler A, Pasquero C, Konhauser KO, Newman DK (2005) Deposition of banded iron  
494 formations by anoxygenic phototrophic Fe(II)-oxidizing bacteria. *Geology*, **33**, 865-868.
- 495 Kashefi K, Holmes DE, Baross JA, Lovley DR (2003) Thermophily in the Geobacteraceae:  
496 *Geothermobacter ehrlichii* gen. nov., sp. nov., a Novel Thermophilic Member of the  
497 Geobacteraceae from the “Bag City” Hydrothermal Vent. *Applied and Environmental*  
498 *Microbiology*, **69**, 2985-2993.
- 499 Kasting JF (2005) Methane and climate during the Precambrian era. *Precambrian Research* **137**,  
500 119-129.

- 501 Knoll AH, Bergmann KD, Strauss JV (2016) Life: the first two billion years. *Phil. Trans. R. Soc.*  
502 *B*, **371**, 20150493.
- 503 Konhauser K, Newman D, Kappler A (2005) The potential significance of microbial Fe(III)  
504 reduction during deposition of Precambrian banded iron formations. *Geobiology*, **3**, 167-  
505 177.
- 506 Kostka JE, Luther GW (1994) Partitioning and speciation of solid phase iron in saltmarsh  
507 sediments. *Geochemica Cosmochimica Acta*, **58**, 1701-1710.
- 508 Kostka JE, Roychoudhury A, Van Cappellen P (2002) Rates and controls of anaerobic microbial  
509 respiration across spatial and temporal gradients in saltmarsh sediments.  
510 *Biogeochemistry*, **60**, 49-76.
- 511 Kozich JJ, Westcott SL, Baxter NT, Highlander SK, Schloss PD (2013) Development of a dual-  
512 index sequencing strategy and curation pipeline for analyzing amplicon sequence data on  
513 the MiSeq Illumina sequencing platform. *Applied and environmental microbiology*, **79**,  
514 5112-5120.
- 515 Lovley D, Phillips E (1986) Organic matter mineralization with reduction of ferric iron in  
516 anaerobic sediments. *Applied and Environmental Microbiology*, **51**, 683-689.
- 517 Lovley DR, Goodwin S (1988) Hydrogen concentrations as an indicator of the predominant  
518 terminal electron-accepting reactions in aquatic sediments. *Geochimica et Cosmochimica*  
519 *Acta*, **52**, 2993-3003.
- 520 Lovley DR, Phillips EJ (1987) Competitive mechanisms for inhibition of sulfate reduction and  
521 methane production in the zone of ferric iron reduction in sediments. *Applied and*  
522 *Environmental Microbiology*, **53**, 2636-2641.
- 523 Niemann H, Steinle L, Brees J, Bussmann I, Treude T, Krause S, Elvert M, Lehmann MF (2015)  
524 Toxic effects of lab-grade butyl rubber stoppers on aerobic methane oxidation. *Limnology*  
525 *and Oceanography: Methods*, **13**, 40-52.
- 526 Noroi KA, Thamdrup B, Schubert CJ (2013) Anaerobic oxidation of methane in an iron-rich  
527 Danish freshwater lake sediment. *Limnology and oceanography*, **58**, 546-554.
- 528 Pavlov AA, Kasting JF, Brown LL, Rages KA, Freedman R (2000) Greenhouse warming by  
529 CH<sub>4</sub> in the atmosphere of early Earth. *Journal of Geophysical Research: Planets*, **105**,  
530 11981-11990.
- 531 Posth NR, Konhauser KO, Kappler A (2013) Microbiological processes in banded iron formation  
532 deposition. *Sedimentology*, **60**, 1733-1754.
- 533 Poulton SW, Canfield DE (2005) Development of a sequential extraction procedure for iron:  
534 implications for iron partitioning in continentally derived particulates. *Chemical Geology*,  
535 **214**, 209-221.

- 536 Poulton SW, Canfield DE (2011) Ferruginous conditions: a dominant feature of the ocean  
537 through Earth's history. *Elements*, **7**, 107-112.
- 538 Riedinger N, Formolo M, Lyons T, Henkel S, Beck A, Kasten S (2014) An inorganic  
539 geochemical argument for coupled anaerobic oxidation of methane and iron reduction in  
540 marine sediments. *Geobiology*, **12**, 172-181.
- 541 Roden EE, Wetzel RG (1996) Organic carbon oxidation and suppression of methane production  
542 by microbial Fe (III) oxide reduction in vegetated and unvegetated freshwater wetland  
543 sediments. *Limnology and Oceanography*, **41**, 1733-1748.
- 544 Roden EE, Wetzel RG (2002) Kinetics of microbial Fe (III) oxide reduction in freshwater  
545 wetland sediments. *Limnology and Oceanography*, **47**, 198-211.
- 546 Rooze J, Egger M, Tsandev I, Slomp CP (2016) Iron-dependent anaerobic oxidation of methane  
547 in coastal surface sediments: Potential controls and impact. *Limnology and*  
548 *Oceanography*.
- 549 Rotaru A-E, Shrestha PM, Liu F, Shrestha M, Shrestha D, Embree M, Zengler K, Wardman C,  
550 Nevina KP, Lovley DR (2014) A new model for electron flow during anaerobic  
551 digestion: direct interspecies electron transfer to Methanosaeta for the reduction of  
552 carbon dioxide to methane. *Energy & Environmental Science*, **7**, 408-415.
- 553 Scheller S, Yi H, Chadwick GL, Mcglynn SE, Orphan VJ (2016) Artificial electron acceptors  
554 decouple archaeal methane oxidation from sulfate reduction. *Science*, **351**, 703-707.
- 555 Schloss PD, Westcott SL, Ryabin T, Hall JR, Hartmann M, Hollister EB, Lesniewski RA,  
556 Oakley BB, Parks DH, Robinson CJ (2009) Introducing mothur: open-source, platform-  
557 independent, community-supported software for describing and comparing microbial  
558 communities. *Applied and environmental microbiology*, **75**, 7537-7541.
- 559 Segarra KEA, Comerford C, Slaughter J, Joye SB (2013) Impact of electron acceptor availability  
560 on the anaerobic oxidation of methane in coastal freshwater and brackish wetland  
561 sediments. *Geochimica et Cosmochimica Acta*, **115**, 15-30.
- 562 Sivan O, Adler M, Pearson A, Gelman F, Bar-Or I, John SG, Eckert W (2011) Geochemical  
563 evidence for iron-mediated anaerobic oxidation of methane. *Limnology and*  
564 *Oceanography*, **56**, 1536-1544.
- 565 Sivan O, Antler G, Turchyn AV, Marlow JJ, Orphan VJ (2014) Iron oxides stimulate sulfate-  
566 driven anaerobic methane oxidation in seeps. *Proceedings of the National Academy of*  
567 *Sciences*, **111**, 4139-4147.
- 568 Sivan O, Shusta SS, Valentine DL (2016) Methanogens rapidly transition from methane  
569 production to iron reduction. *Geobiology*, DOI: **10.1111/gbi.12172**.
- 570 Stolz JF, Ellis DJ, Blum JS, Ahmann D, Lovley DR, Oremland RS (1999) Note: *Sulfurospirillum*  
571 *barnesii* sp. nov. and *Sulfurospirillum arsenophilum* sp. nov., new members of the



- 572 Sulfurospirillum clade of the  $\epsilon$ -Proteobacteria. *International Journal of Systematic and*  
573 *Evolutionary Microbiology*, **49**, 1177-1180.
- 574 Stookey LL (1970) Ferrozine---a new spectrophotometric reagent for iron. *Analytical Chemistry*,  
575 **42**, 779-781.
- 576 Sturm A, Fowle DA, Jones C, Leslie KL, Nomosatryo S, Henny C, Canfield DE, Crowe S  
577 (2015) Rates and pathways of methane oxidation in ferruginous Lake Matano, Indonesia.  
578 *Biogeosciences Discussions*, **12**, 1-34.
- 579 Ueno Y, Yamada K, Yoshida N, Maruyama S, Isozaki Y (2006) Evidence from fluid inclusions  
580 for microbial methanogenesis in the early Archaean era. *Nature*, **440**, 516-519.
- 581 Vargas M, Kashefi K, Blunt-Harris EL, Lovley DR (1998) Microbiological evidence for Fe(III)  
582 reduction on early Earth. *Nature*, **395**, 65-67.
- 583 Zavarzina DG, Sokolova TG, Tourova TP, Chernyh NA, Kostrikina NA, Bonch-Osmolovskaya  
584 EA (2007) *Thermincola ferriacetica* sp. nov., a new anaerobic, thermophilic, facultatively  
585 chemolithoautotrophic bacterium capable of dissimilatory Fe(III) reduction.  
586 *Extremophiles*, **11**, 1-7.
- 587 Zehnder AJ, Brock TD (1980) Anaerobic methane oxidation: occurrence and ecology. *Applied*  
588 *and Environmental Microbiology*, **39**, 194-204.
- 589 Zhou S, Xu J, Yang G, Zhuang L (2014) Methanogenesis affected by the co-occurrence of iron  
590 (III) oxides and humic substances. *FEMS Microbiology Ecology*, **88**, 107-120.

591

592

593

594

595

596

597

598

599 **Figure Captions**

600 **Figure 1. HCl-extractable Fe<sup>2+</sup> for sediment enrichments with (a) ferrihydrite and (b)**  
601 **goethite over 497 days.** Timeline at top shows transfer dates and dilution ratios. “A” represents  
602 days that controls were autoclaved. Red and black symbols represent treatments with and without  
603 CH<sub>4</sub>, respectively. White symbols represent autoclaved controls. All treatments were run in  
604 duplicate (circle and triangle symbols). Tertiary enrichments are magnified as inset. Photos  
605 depict 2° and 3° enrichment bottles on day 497 with evidence for magnetic mineral formation in  
606 live treatments amended with ferrihydrite.

607 **Figure 2. Accumulation of CH<sub>4</sub> in the headspace of sediment enrichments.** Timeline at top  
608 shows transfer dates and dilution ratios. Solid and dotted lines represent ferrihydrite and goethite  
609 treatments, respectively. All treatments were run in duplicate (circle and triangle symbols).  
610 Original headspace was 100% N<sub>2</sub>.

611 **Figure 3. Dissolved inorganic carbon (DIC) isotopic composition and concentration for**  
612 **sediment enrichments amended with <sup>13</sup>CH<sub>4</sub> and either (a,c) ferrihydrite or (b,d) goethite.**  
613 Timeline at top shows transfer dates and dilution ratios. “A” represents days that controls were  
614 autoclaved. Red and white symbols represent live treatments and autoclaved controls,  
615 respectively. Errors bars represent standard deviation of triplicate measurements. Calculated  
616 methane oxidation rates for the 1° enrichment were 1.7 and 1.1 μM CH<sub>4</sub> d<sup>-1</sup> ferrihydrite bottles 1  
617 and 2, respectively and 0.2 and 0.8 μM CH<sub>4</sub> d<sup>-1</sup> for goethite bottles 1 and 2, respectively. Isotopic  
618 data are not plotted for DIC concentrations 0.5 mM. Rate calculations were not possible for the  
619 2° enrichment due to low/variable DIC.

620 **Figure 4. 16S rRNA gene diversity and phylogenetic diversity for inoculum and sediment**  
621 **enrichments amended with (a) ferrihydrite and (b) goethite.** Samples were taken on day 15  
622 (1° enrichment), 72 (2° enrichment) and 469 (3° enrichment). Red and black symbols represent  
623 treatments with and without CH<sub>4</sub>, respectively. Gray diamonds represent inoculum samples. All  
624 treatments were run in duplicate (circle and triangle symbols). Species richness, phylogenetic  
625 diversity, and species evenness for the sediment inoculum and enrichments normalized to 4000  
626 sequences per sample are shown to the right of barcharts.

627 **Figure 5. Rates of HCl-extractable Fe<sup>3+</sup> reduction rates vs. CH<sub>4</sub> production (black symbols)**  
628 **or CH<sub>4</sub> oxidation (red symbols).** Autoclaved controls are white circles. “F” indicates  
629 ferrihydrite and “G” indicates goethite. The red line indicates the line for the predicted ratio of 1  
630 mol CH<sub>4</sub> oxidized per 8 mol Fe<sup>3+</sup> reduced. Tertiary enrichments are magnified as inset.

631

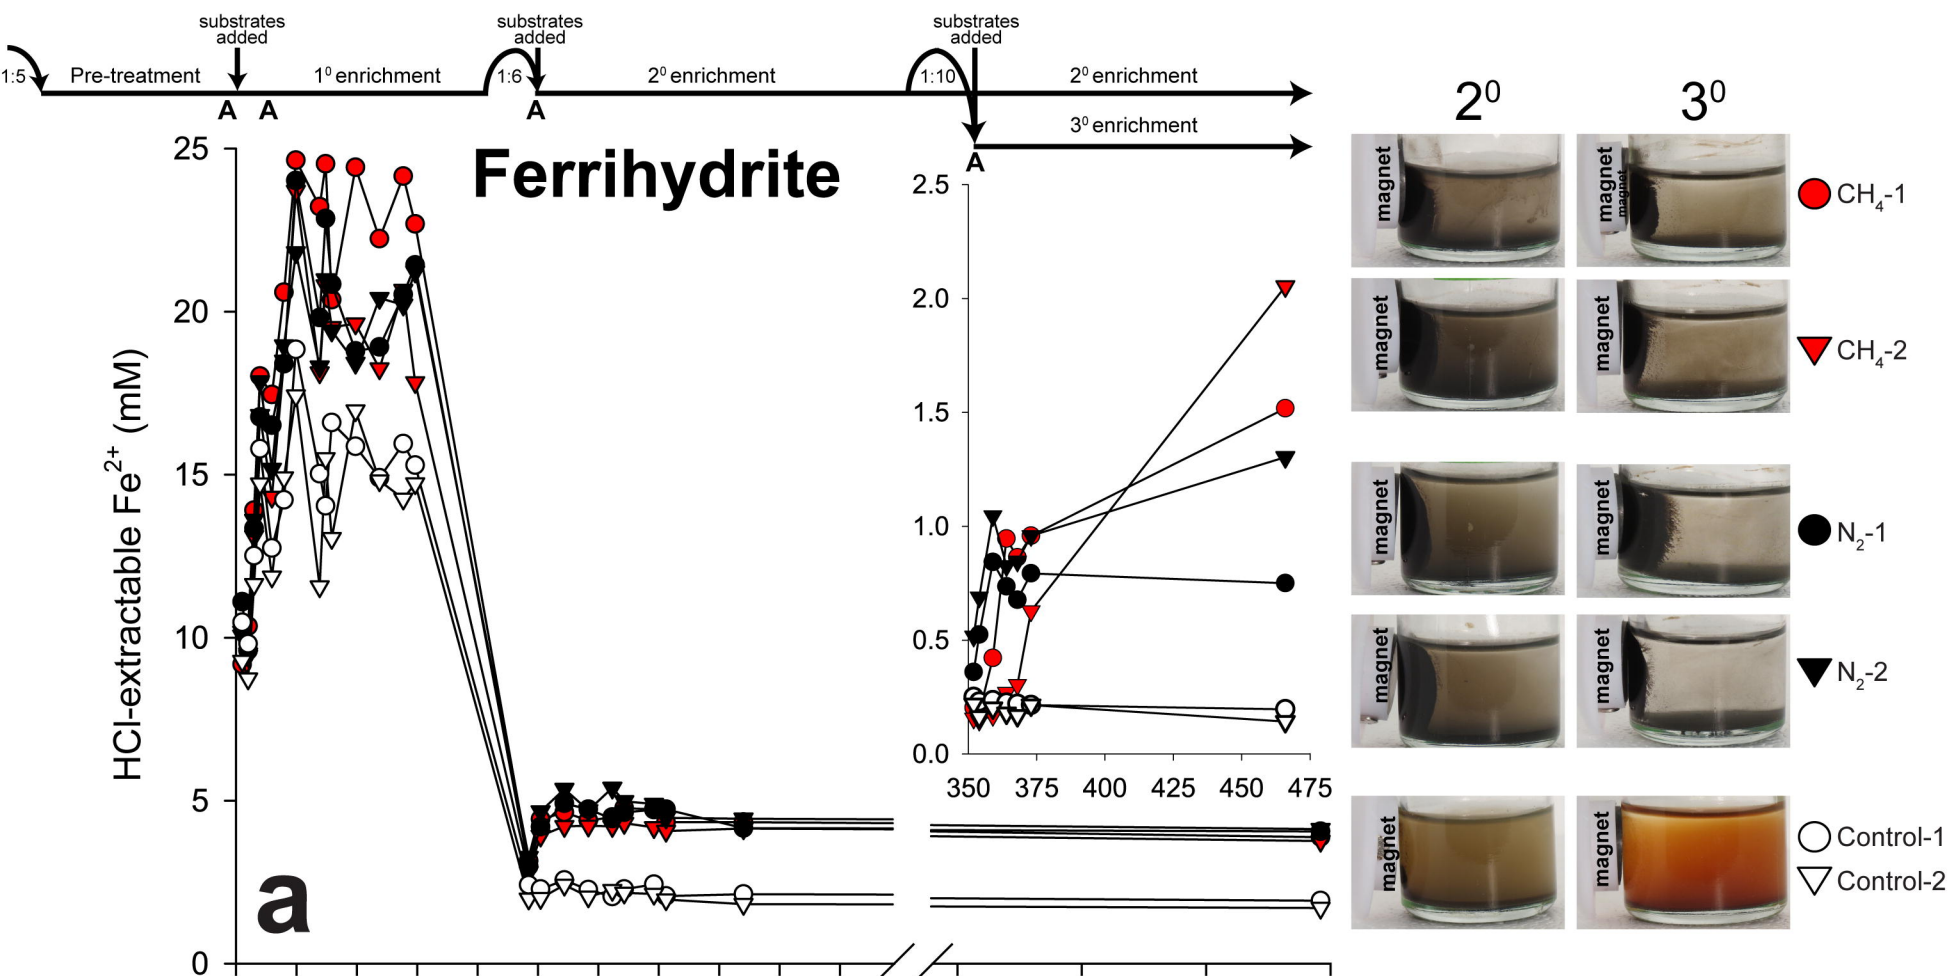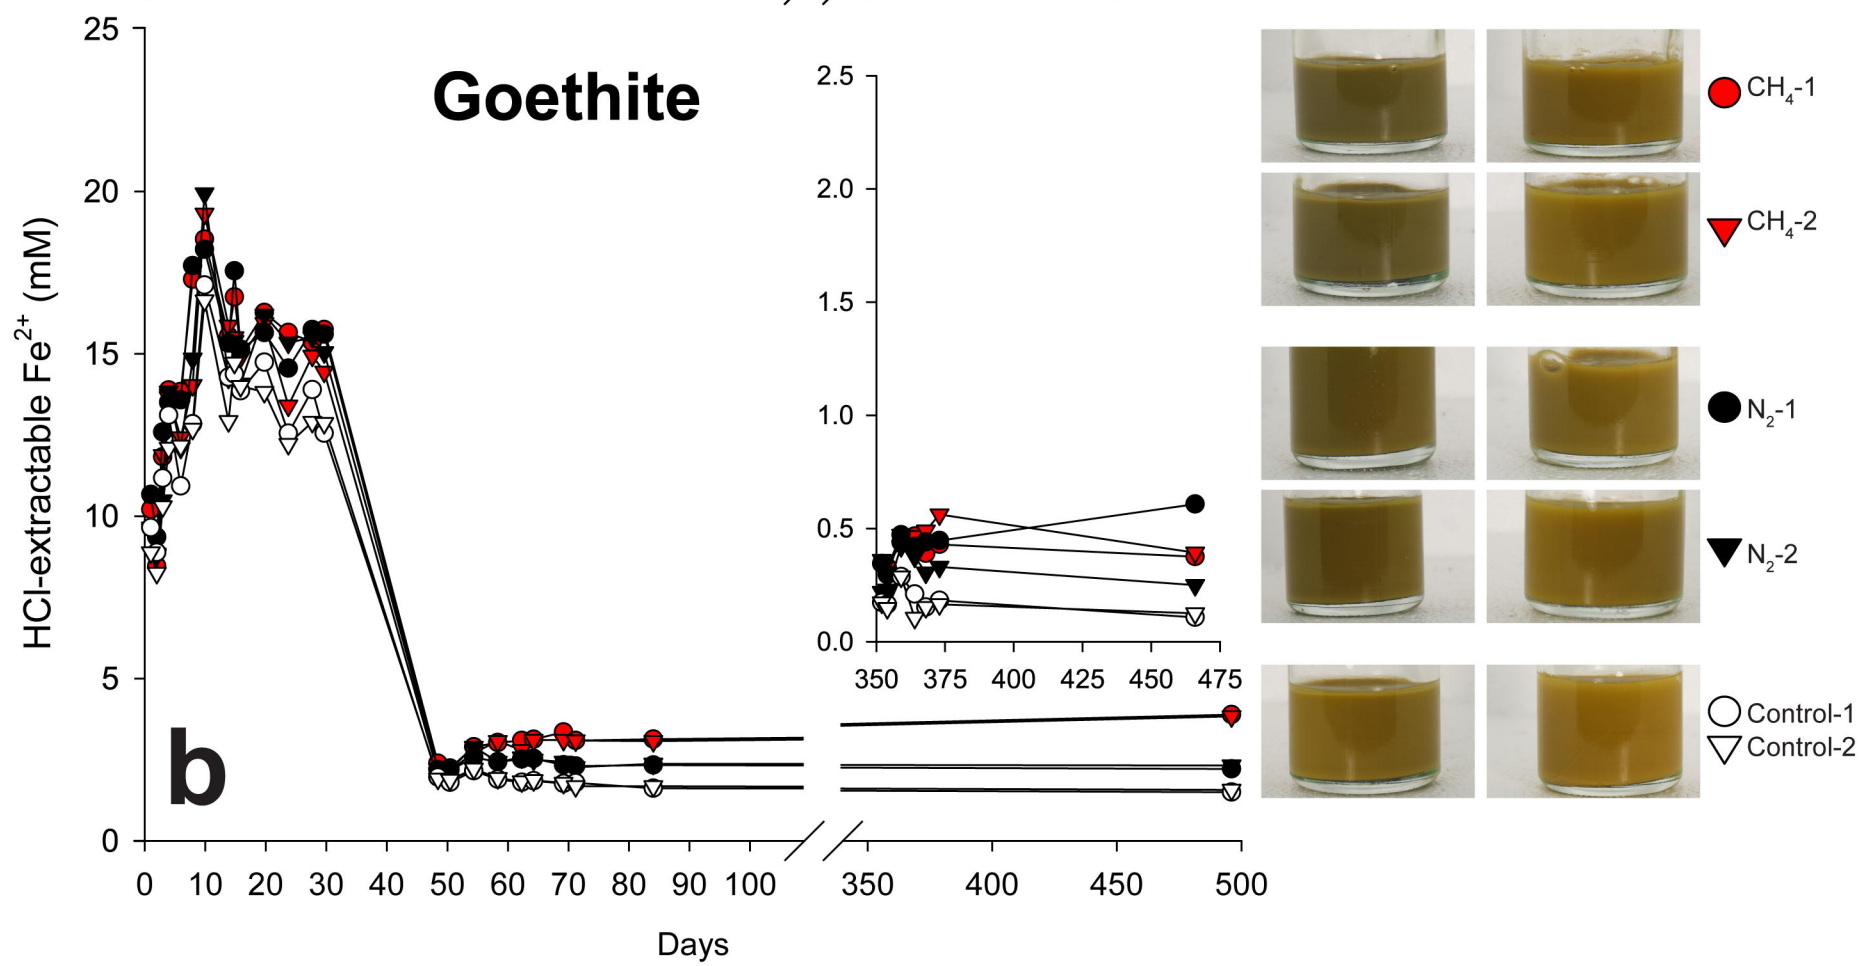

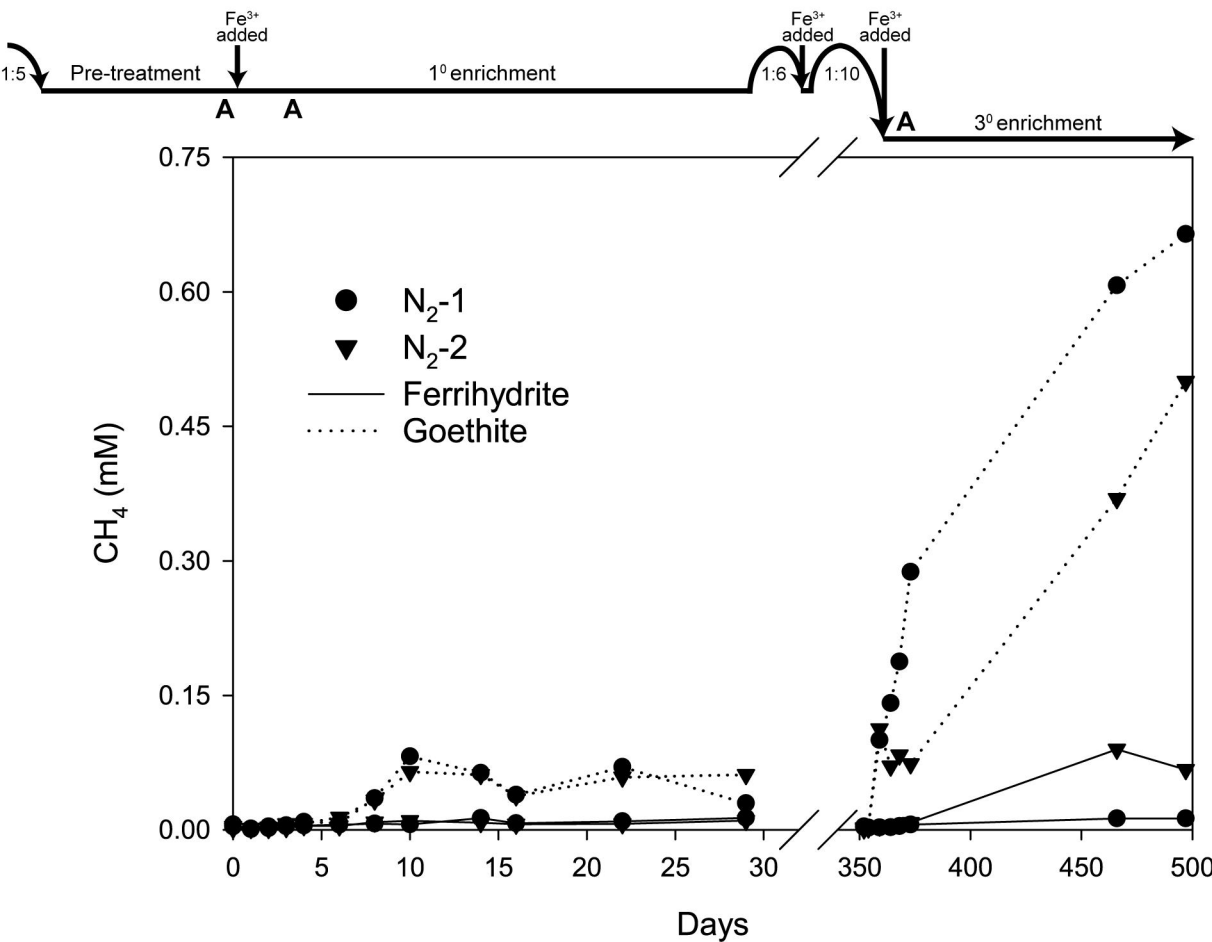

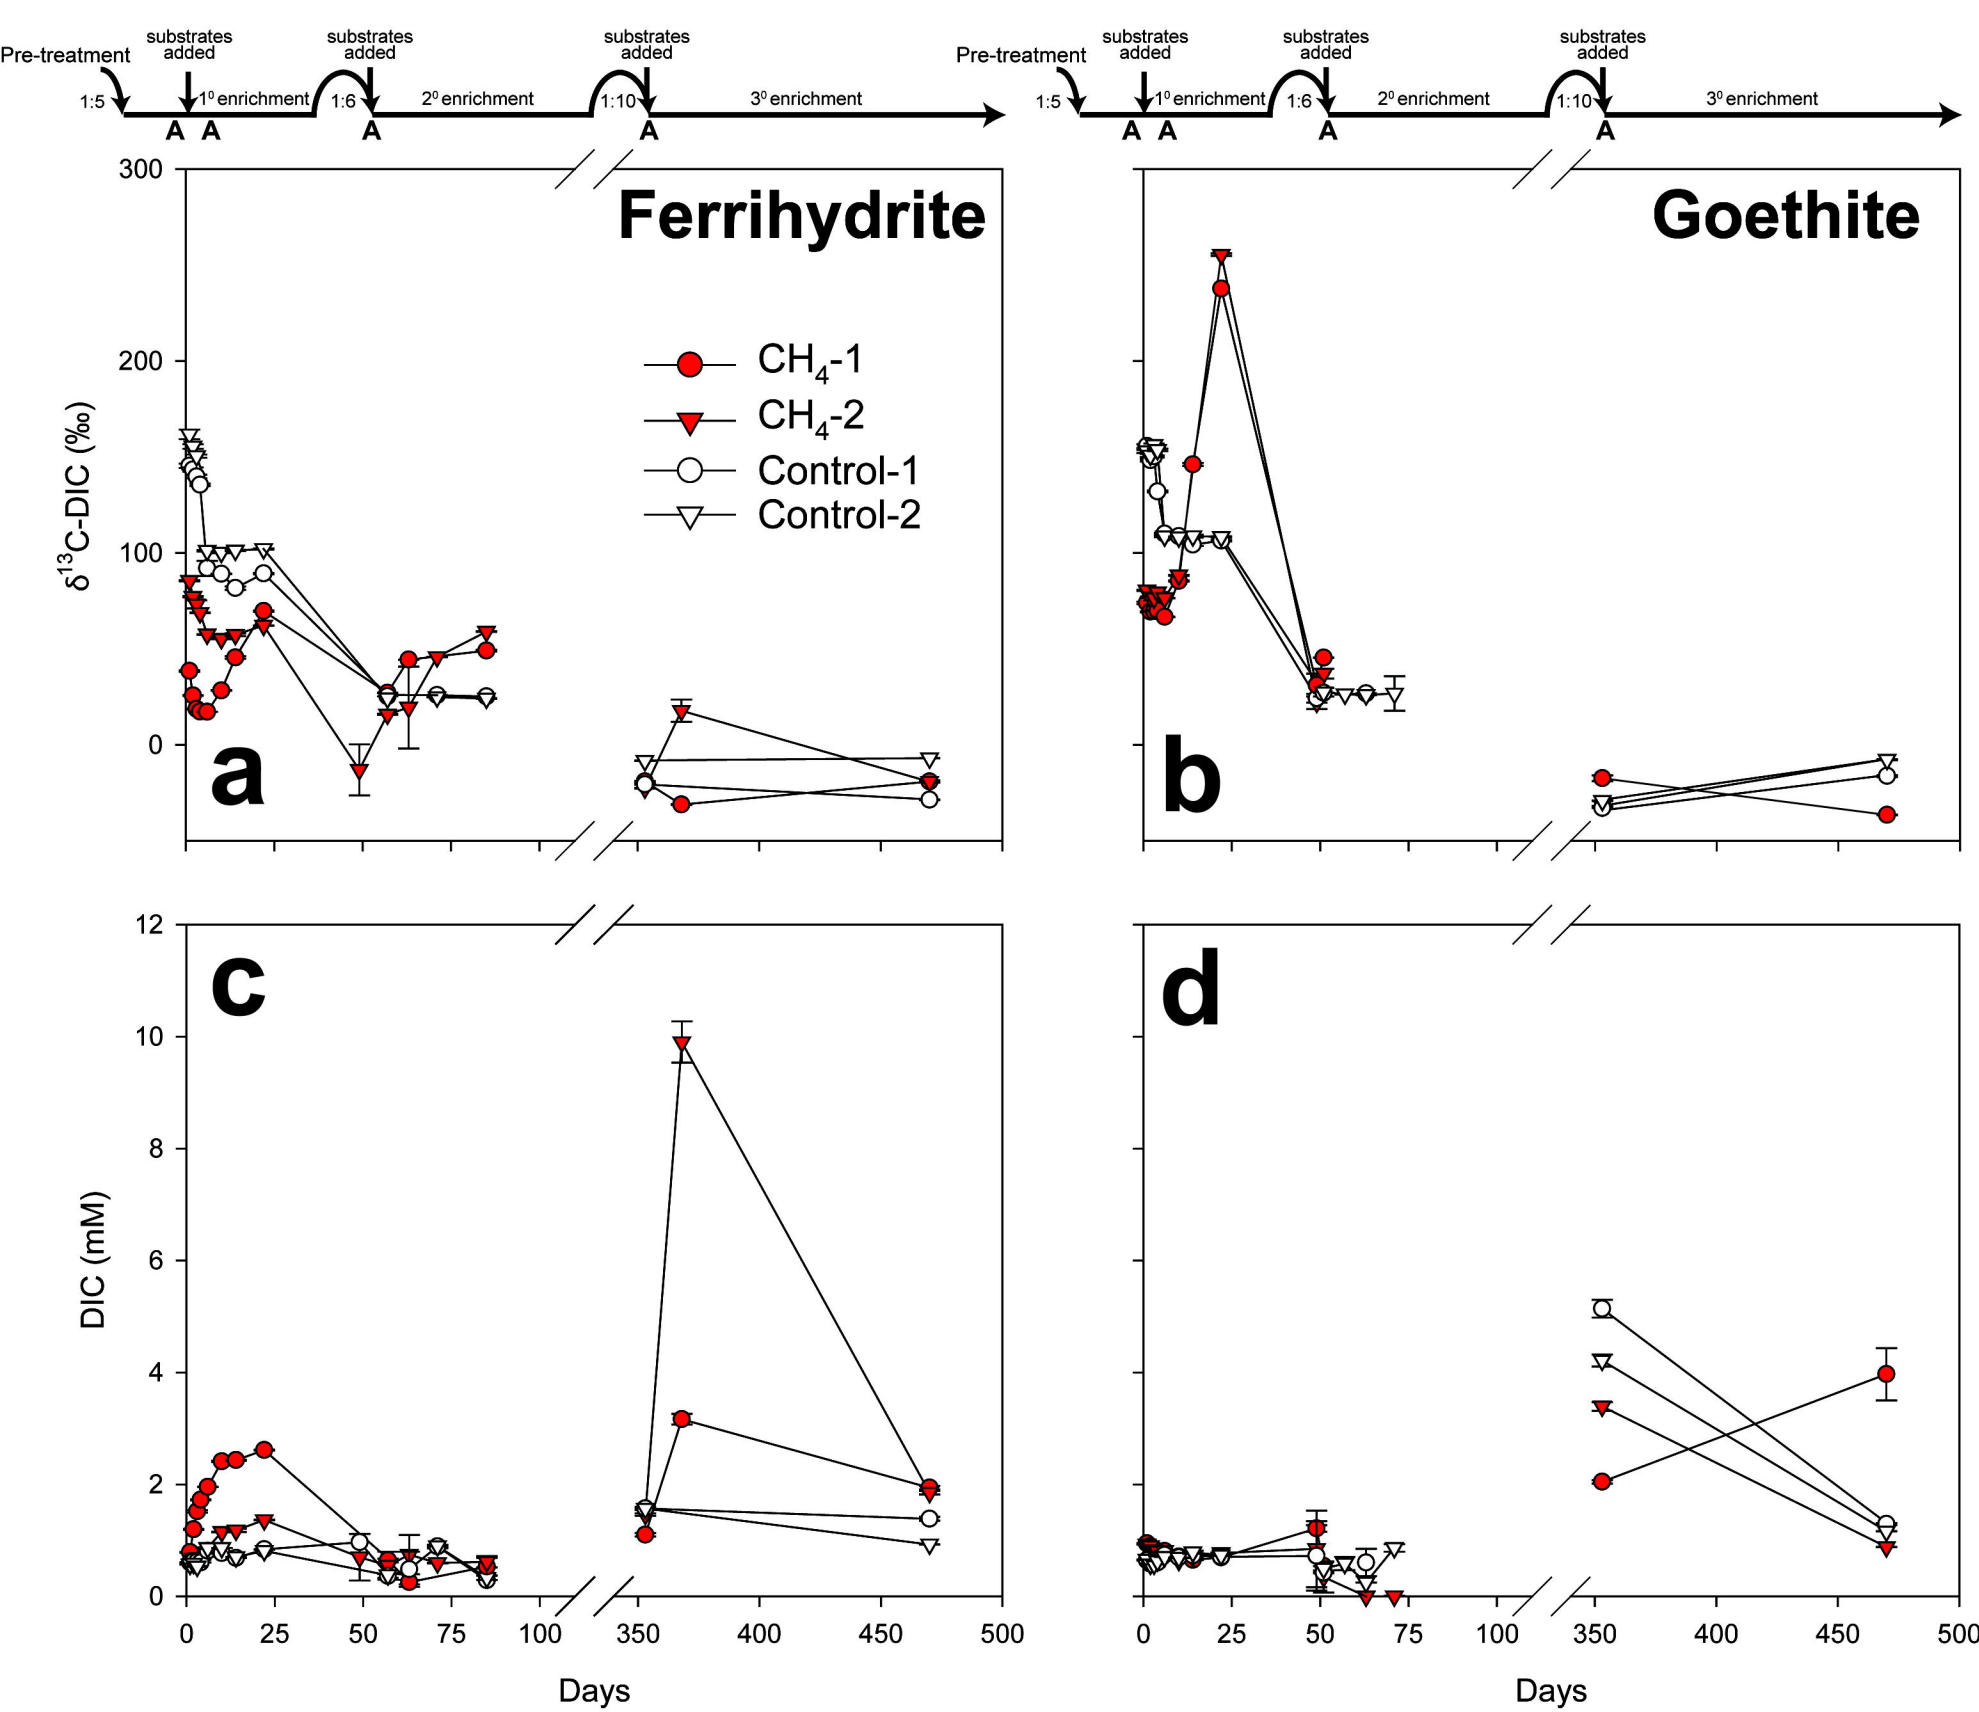

# Ferrihydrite

bioRxiv preprint doi: <https://doi.org/10.1101/087783>; this version posted November 15, 2016. The copyright holder for this preprint (which was not certified by peer review) is the author/funder. All rights reserved. No reuse allowed without permission.

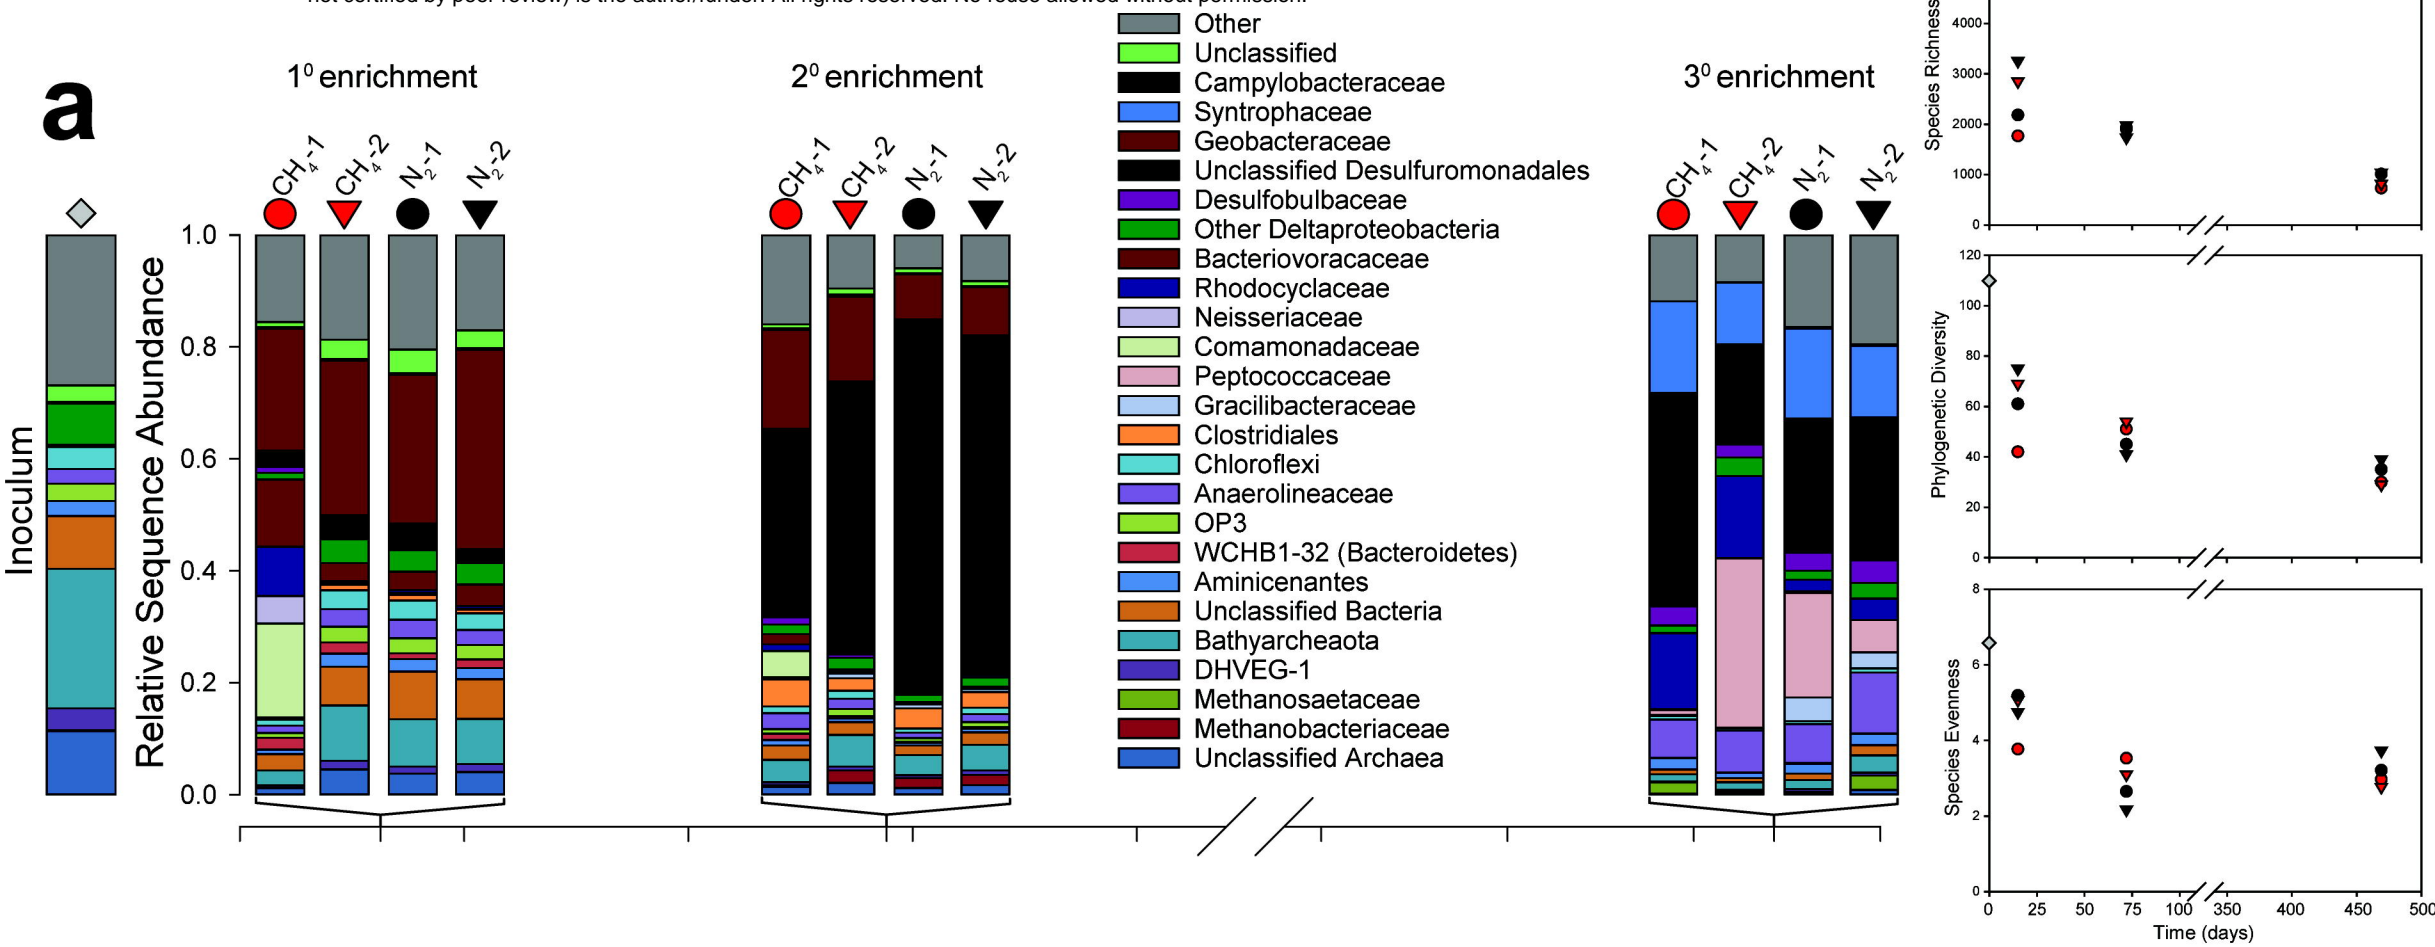

# Goethite

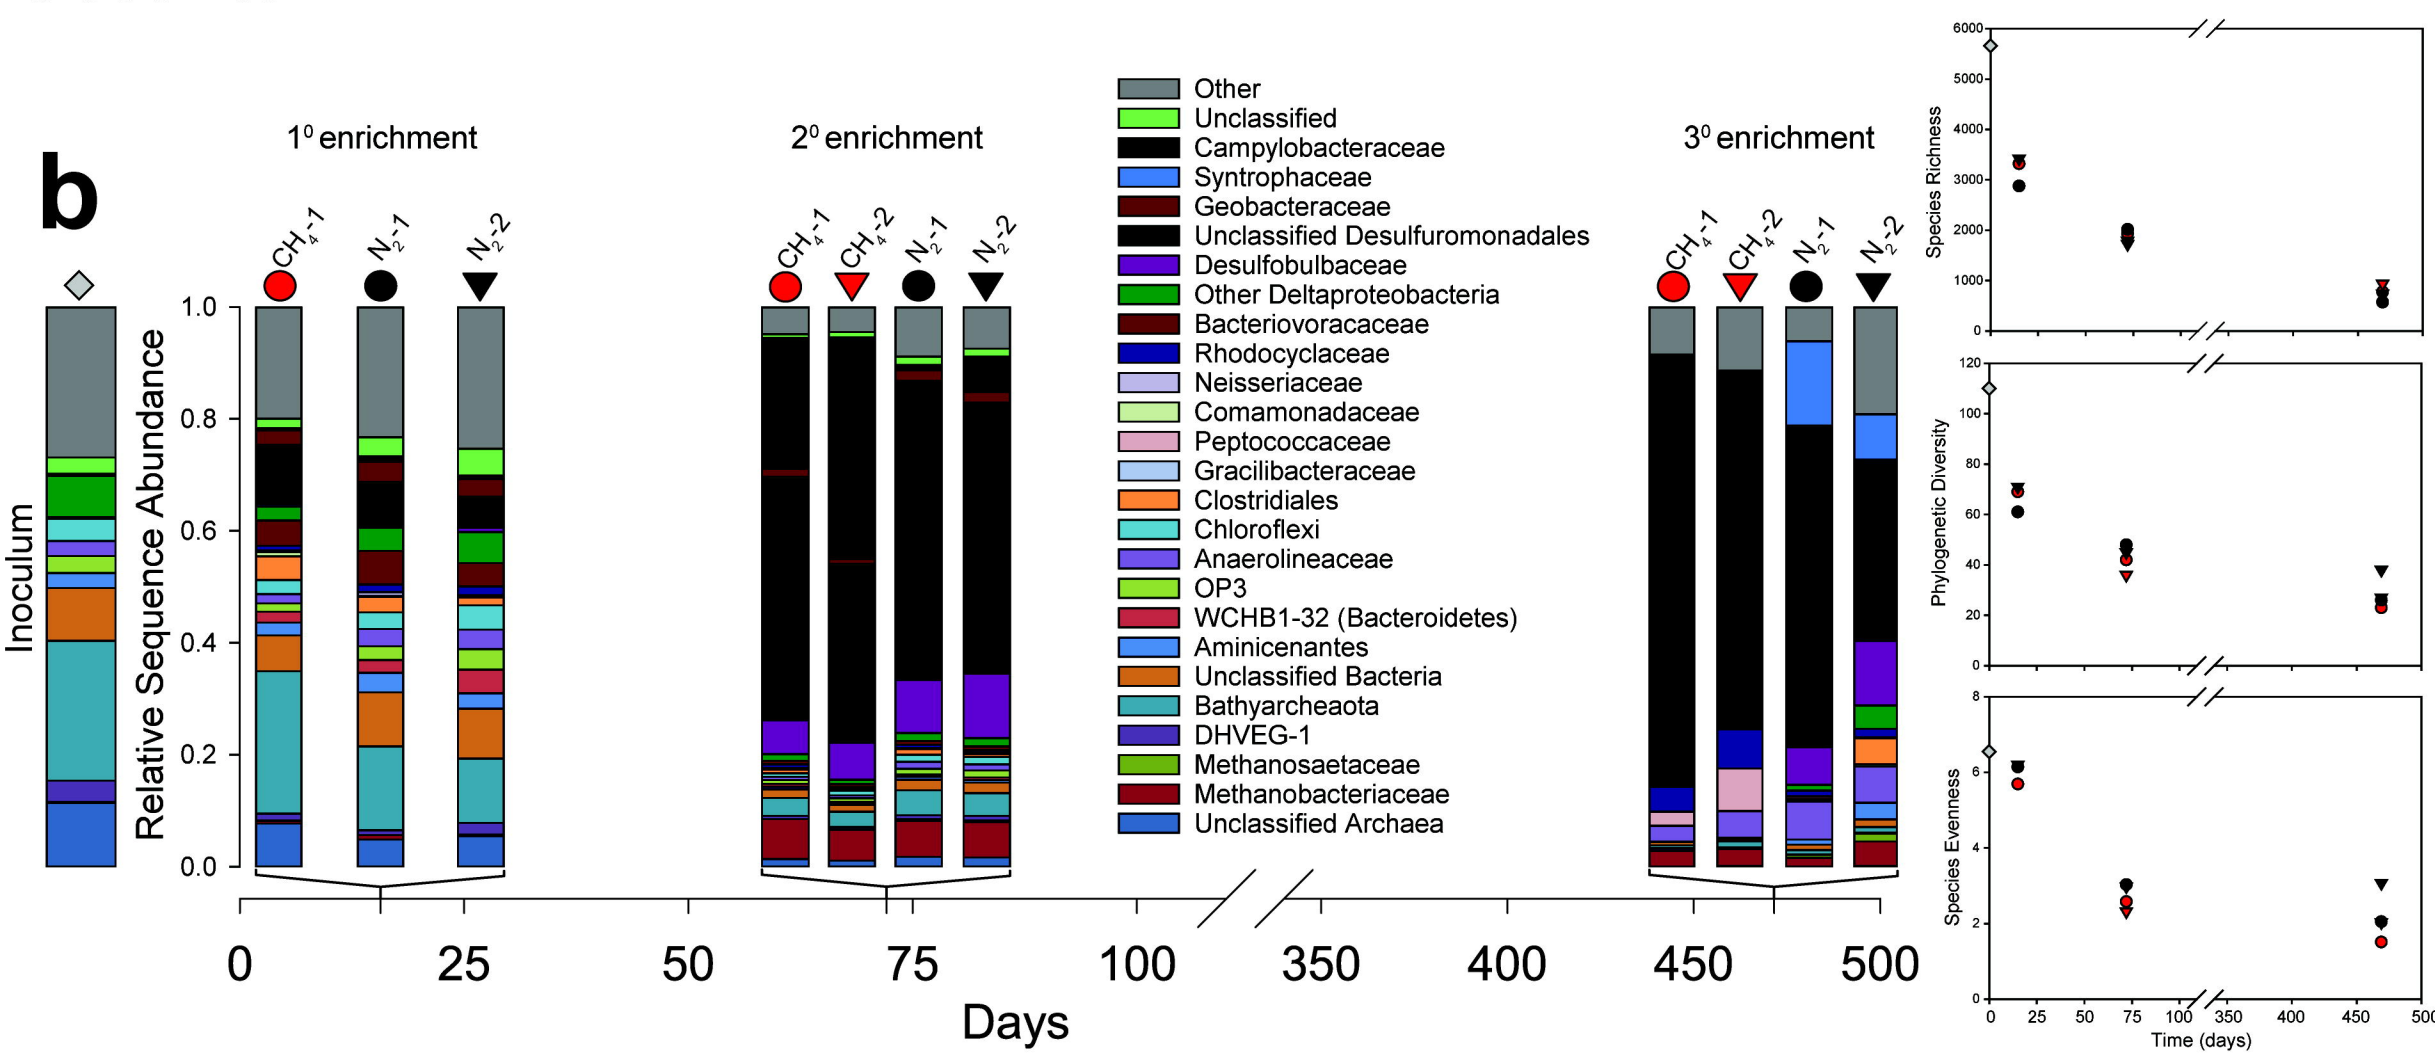

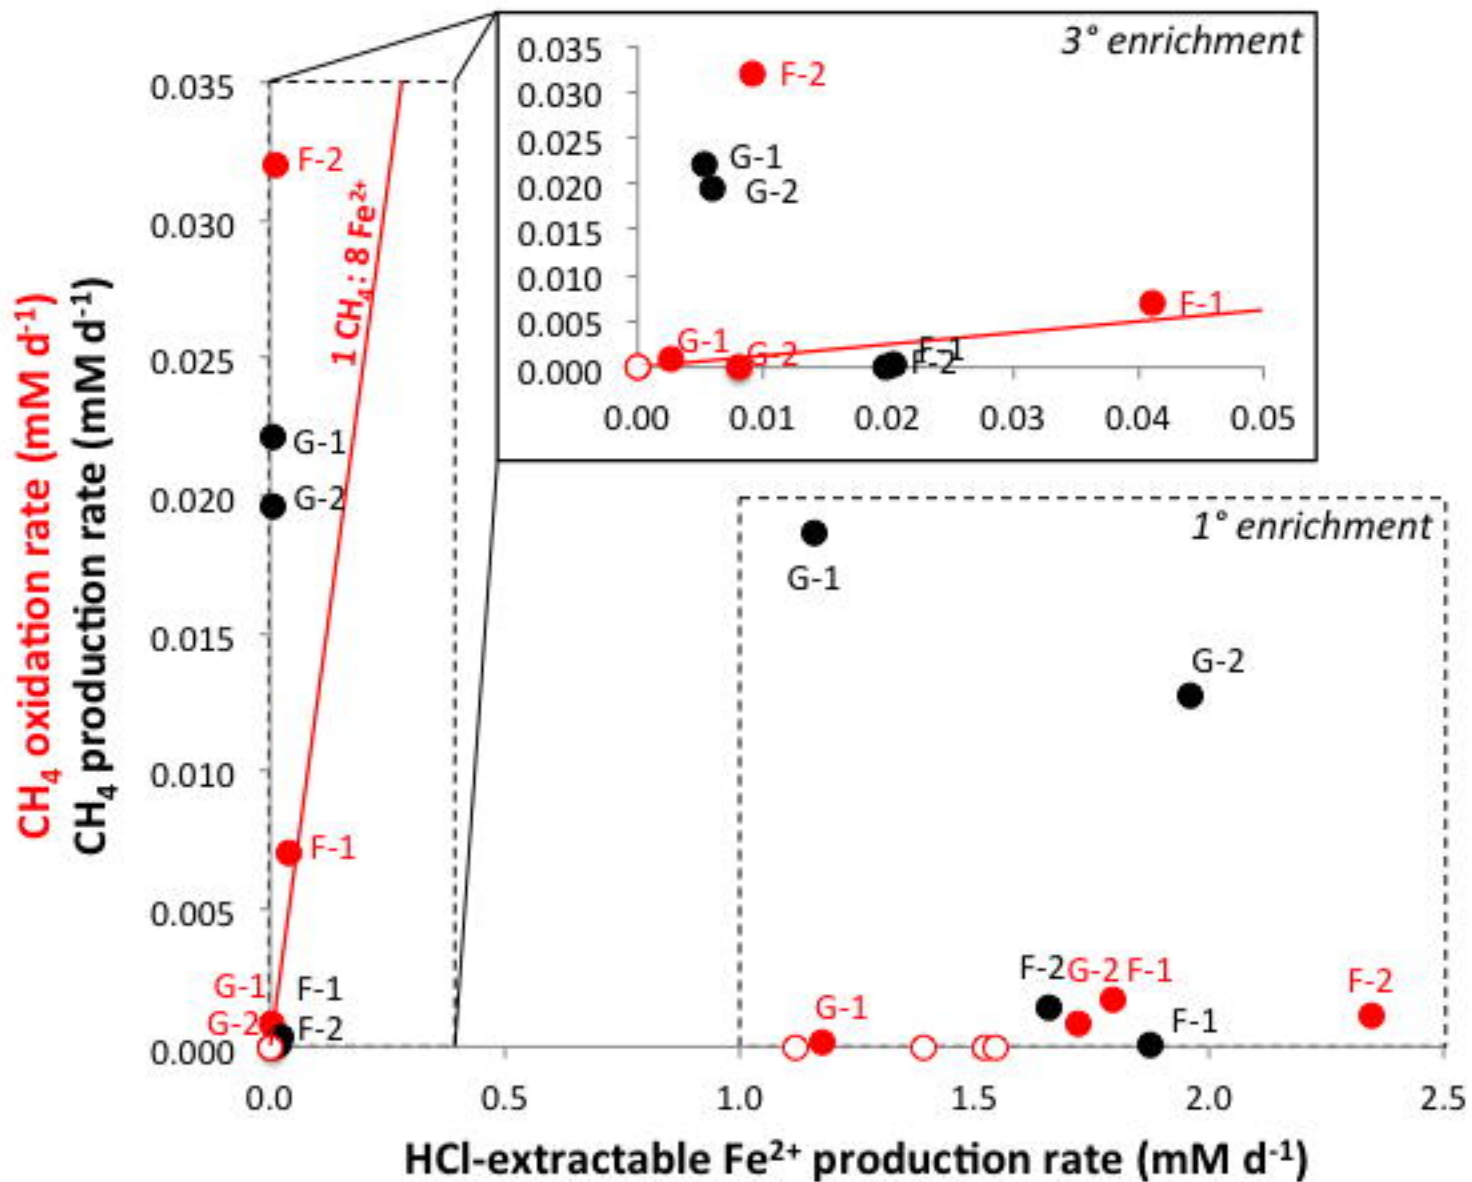

Source: http://www.biorxiv.org/content/10.1101/087783v1.full.pdf
